# Supplementary material
Source: publisher site journal article supplement (https://www.dovepress.com/get_supplementary_file.php?f=355043.xlsx)
Supplement: Supplementary file 1 [file get_supplementary_file.php]

## Sheet: supplementary table 1 _
supplementary table 1 _The top 10 significantly differentially expressed circRNAs in the sequencing results
CircRNA_ID	Chr	start	end	strand	full_length	spliced_length	gene_id
up
hsa_circ_0002465	6	73723250	73736508	+	13258	386	ENSG00000156535;
hsa_circ_0001742	7	129205202	129206587	+	1385	727	ENSG00000128602;
hsa_circ_0072309	5	38523418	38530666	-	7248	580	ENSG00000113594;
hsa_circ_0084927	8	94664696	94665196	+	500	287	ENSG00000104413;
hsa_circ_0006814	9	135866455	135883078	-	16623	506	ENSG00000130559;
down
hsa_circ_0005897	6	47253255	47286595	-	33340	1413	ENSG00000146072;
hsa_circ_0072387	5	43294055	43297166	-	3111	609	ENSG00000112972;
hsa_circ_0007387	2	63404047	63439871	-	35823	1051	ENSG00000143951;
hsa_circ_0057685	2	199308759	199328910	-	20151	567	ENSG00000119042;
hsa_circ_0003209	20	31782248	31797515	+	15267	891	ENSG00000088325;

## Sheet: supplementary table 2
Supplementary table 2 Basic information of each gene in cytoscape (for PPI plotting)
AverageShortestPathLength	BetweennessCentrality	ClosenessCentrality	ClusteringCoefficient	Column 2	Degree	Eccentricity	IsSingleNode	MCODE::Clusters (1)	MCODE::Node Status (1)	MCODE::Score (1)	name	NeighborhoodConnectivity	NumberOfDirectedEdges	NumberOfUndirectedEdges	PartnerOfMultiEdgedNodePairs	Radiality	selected	SelfLoops	shared name	Stress	TopologicalCoefficient
1.5	0	0.666667	0	up	1	2	FALSE		Unclustered	0	ACBD5	2	0	1	0	0.75	FALSE	0	ACBD5	0	0
1	1	1	0	up	2	1	FALSE		Unclustered	0.666667	ANKRD12	1	0	2	0	1	FALSE	0	ANKRD12	2	0
3.5	0.0101357	0.285714	0	up	2	9	FALSE		Unclustered	0.666667	ACSL4	7	0	2	0	0.833333	FALSE	0	ACSL4	68	0.5
2.74194	0.222497	0.364706	0.181818	up	12	9	FALSE	Cluster 0	Clustered	1.92857	STAT3	5.16667	0	12	0	0.883871	FALSE	0	STAT3	1424	0.166667
3.82258	0.00661026	0.261603	0	up	2	8	FALSE		Unclustered	0.666667	ELOVL6	3.5	0	2	0	0.811828	FALSE	0	ELOVL6	26	0.5
4.19355	0	0.238462	1	up	3	10	FALSE	Cluster 0	Clustered	3	AGO1	4.66667	0	3	0	0.787097	FALSE	0	AGO1	0	0.583333
4.16129	0.0634585	0.24031	0.5	up	4	10	FALSE	Cluster 0	Clustered	3	E2F2	3.75	0	4	0	0.789247	FALSE	0	E2F2	348	0.4375
4.19355	0	0.238462	1	up	3	10	FALSE	Cluster 0	Clustered	3	AGO3	4.66667	0	3	0	0.787097	FALSE	0	AGO3	0	0.583333
3.27419	0.246921	0.305419	0.190476	up	7	9	FALSE	Cluster 0	Seed	3	RBBP7	3.71429	0	7	0	0.848387	FALSE	0	RBBP7	1392	0.214286
3.3871	0.0639873	0.295238	0	up	3	9	FALSE		Unclustered	0.5	AKTIP	5.66667	0	3	0	0.84086	FALSE	0	AKTIP	326	0.333333
4.37097	0	0.228782	0	up	1	10	FALSE		Unclustered	0	MYO1D	3	0	1	0	0.775269	FALSE	0	MYO1D	0	0
4.37097	0	0.228782	0	up	1	10	FALSE		Unclustered	0	HECA	3	0	1	0	0.775269	FALSE	0	HECA	0	0
2.46774	0.487463	0.405229	0.133333	up	15	8	FALSE	Cluster 0	Seed	2.14286	VEGFA	5	0	15	0	0.902151	FALSE	0	VEGFA	3648	0.133333
1	0	1	1	up	2	1	FALSE	Cluster 0	Clustered	2	ANKFY1	2	0	2	0	1	FALSE	0	ANKFY1	0	1
1	0	1	1	up	2	1	FALSE	Cluster 0	Clustered	2	BTBD7	2	0	2	0	1	FALSE	0	BTBD7	0	1
1	0	1	1	up	2	1	FALSE	Cluster 0	Seed	2	ZBTB6	2	0	2	0	1	FALSE	0	ZBTB6	0	1
1.5	0	0.666667	0	up	1	2	FALSE		Unclustered	0	ARHGAP12	2	0	1	0	0.75	FALSE	0	ARHGAP12	0	0
4.17742	0.150714	0.239382	0	up	2	7	FALSE		Unclustered	0.666667	ARHGAP1	4	0	2	0	0.788172	FALSE	0	ARHGAP1	1120	0.5
5.03226	0.122686	0.198718	0	up	2	8	FALSE		Unclustered	0.666667	SCAMP2	2	0	2	0	0.731183	FALSE	0	SCAMP2	904	0.5
3.35484	0.228045	0.298077	0.2	up	6	6	FALSE	Cluster 0	Clustered	3	OCRL	3.33333	0	6	0	0.843011	FALSE	0	OCRL	1706	0.283333
3.85484	0.00127459	0.259414	0.666667	up	3	10	FALSE		Unclustered	1.66667	ARHGEF7	7.66667	0	3	0	0.809677	FALSE	0	ARHGEF7	14	0.479167
3	0.106285	0.333333	0.254545	up	11	9	FALSE	Cluster 0	Clustered	1.92857	FYN	5.63636	0	11	0	0.866667	FALSE	0	FYN	910	0.205387
3.62903	0.056295	0.275556	0.190476	up	7	10	FALSE	Cluster 0	Clustered	3	ITCH	4	0	7	0	0.824731	FALSE	0	ITCH	504	0.247619
3.51613	0.00691874	0.284404	0.5	up	5	10	FALSE		Unclustered	3	YES1	6.6	0	5	0	0.832258	FALSE	0	YES1	76	0.388235
4.19355	0.0639873	0.238462	0	up	3	10	FALSE		Unclustered	0.5	ARID4B	3	0	3	0	0.787097	FALSE	0	ARID4B	350	0.333333
5.17742	0	0.193146	0	up	1	11	FALSE		Unclustered	0	MLLT1	3	0	1	0	0.721505	FALSE	0	MLLT1	0	0
5.17742	0	0.193146	0	up	1	11	FALSE		Unclustered	0	CHD9	3	0	1	0	0.721505	FALSE	0	CHD9	0	0
4.64516	0	0.215278	0	up	1	9	FALSE		Unclustered	0	BICD2	3	0	1	0	0.756989	FALSE	0	BICD2	0	0
3.66129	0.0322581	0.273128	0.333333	up	3	8	FALSE	Cluster 0	Clustered	2	DYNC1LI2	3	0	3	0	0.822581	FALSE	0	DYNC1LI2	140	0.444444
6.09677	0	0.164021	0	up	1	12	FALSE		Unclustered	0	CABLES1	2	0	1	0	0.660215	FALSE	0	CABLES1	0	0
5.1129	0.0322581	0.195584	0	up	2	11	FALSE		Unclustered	0.666667	WEE1	2.5	0	2	0	0.725806	FALSE	0	WEE1	176	0.5
3.91935	0	0.255144	0	up	1	9	FALSE		Unclustered	0	CIT	5	0	1	0	0.805376	FALSE	0	CIT	0	0
2.93548	0.200123	0.340659	0.1	up	5	8	FALSE	Cluster 0	Clustered	2	RACGAP1	5.2	0	5	0	0.870968	FALSE	0	RACGAP1	1088	0.219048
2.96774	0.0447226	0.336957	0.4	up	6	9	FALSE		Unclustered	2.7	CREB1	7.83333	0	6	0	0.868817	FALSE	0	CREB1	326	0.294872
3.95161	0	0.253061	0	up	1	10	FALSE		Unclustered	0	RAPGEF4	6	0	1	0	0.803226	FALSE	0	RAPGEF4	0	0
3.25806	0	0.306931	1	up	3	9	FALSE		Unclustered	3	TNFSF11	11	0	3	0	0.849462	FALSE	0	TNFSF11	0	0.52381
2.98387	0.14715	0.335135	0.2	up	5	9	FALSE		Unclustered	1.2	MECP2	6.4	0	5	0	0.867742	FALSE	0	MECP2	980	0.269565
3	0.102524	0.333333	0.666667	up	4	7	FALSE	Cluster 0	Clustered	3	DAB2	7.75	0	4	0	0.866667	FALSE	0	DAB2	1000	0.336957
3.66129	0.0634585	0.273128	0.4	up	5	7	FALSE	Cluster 0	Clustered	3	TGOLN2	3.8	0	5	0	0.822581	FALSE	0	TGOLN2	512	0.38
2.96774	0.130199	0.336957	0.4	up	5	7	FALSE	Cluster 0	Seed	3	LDLR	6.4	0	5	0	0.868817	FALSE	0	LDLR	1142	0.269565
3.32258	0.0322581	0.300971	0.333333	up	3	9	FALSE	Cluster 0	Clustered	2	DCBLD2	9	0	3	0	0.845161	FALSE	0	DCBLD2	182	0.45614
4.30645	0	0.23221	0	up	1	10	FALSE		Unclustered	0	UBR5	3	0	1	0	0.77957	FALSE	0	UBR5	0	0
3.45161	0.0753511	0.28972	0.333333	up	3	7	FALSE	Cluster 0	Clustered	2	GBF1	4.66667	0	3	0	0.836559	FALSE	0	GBF1	386	0.393939
1	0	1	0	up	1	1	FALSE		Unclustered	0	EIF2S1	1	0	1	0	1	FALSE	0	EIF2S1	0	0
1	0	1	0	up	1	1	FALSE		Unclustered	0	PPP1R15B	1	0	1	0	1	FALSE	0	PPP1R15B	0	0
4.1129	0	0.243137	0	up	1	10	FALSE		Unclustered	0	EIF5A2	6	0	1	0	0.792473	FALSE	0	EIF5A2	0	0
3.12903	0.155473	0.319588	0.0666667	up	6	9	FALSE	Cluster 0	Clustered	2	TWIST1	5.33333	0	6	0	0.858065	FALSE	0	TWIST1	958	0.222222
3.33871	0.00256388	0.299517	0.666667	up	3	9	FALSE		Unclustered	1.66667	EREG	10.3333	0	3	0	0.844086	FALSE	0	EREG	68	0.54386
1	0	1	0	up	1	1	FALSE		Unclustered	0	FAM126B	1	0	1	0	1	FALSE	0	FAM126B	0	0
1	0	1	0	up	1	1	FALSE		Unclustered	0	ZNF532	1	0	1	0	1	FALSE	0	ZNF532	0	0
4.14516	0	0.241245	1	up	3	10	FALSE	Cluster 0	Clustered	3	FBXO10	4.66667	0	3	0	0.790323	FALSE	0	FBXO10	0	0.583333
3.30645	0.05052	0.302439	0.5	up	4	9	FALSE	Cluster 0	Clustered	3	KLHL20	7	0	4	0	0.846237	FALSE	0	KLHL20	412	0.355263
4.14516	0	0.241245	1	up	3	10	FALSE	Cluster 0	Seed	3	UBE2Q2	4.66667	0	3	0	0.790323	FALSE	0	UBE2Q2	0	0.583333
4.6129	0	0.216783	0	up	1	11	FALSE		Unclustered	0	FMNL3	7	0	1	0	0.75914	FALSE	0	FMNL3	0	0
4.1129	0	0.243137	0	up	1	10	FALSE		Unclustered	0	FOXQ1	6	0	1	0	0.792473	FALSE	0	FOXQ1	0	0
3.19355	0.00256388	0.313131	0.833333	up	4	9	FALSE		Unclustered	2.7	PDGFB	10.75	0	4	0	0.853763	FALSE	0	PDGFB	68	0.467391
3.98387	0	0.251012	0	up	1	10	FALSE		Unclustered	0	LIMK1	11	0	1	0	0.801075	FALSE	0	LIMK1	0	0
3.20968	0	0.311558	1	up	3	9	FALSE		Unclustered	3	JAK1	12.6667	0	3	0	0.852688	FALSE	0	JAK1	0	0.550725
7.79032	0.0322581	0.128364	0	up	2	11	FALSE		Unclustered	0.666667	GNS	1.5	0	2	0	0.547312	FALSE	0	GNS	232	0.5
6.83871	0.0634585	0.146226	0	up	2	10	FALSE		Unclustered	0.666667	SUMF1	2	0	2	0	0.610753	FALSE	0	SUMF1	460	0.5
8.77419	0	0.113971	0	up	1	12	FALSE		Unclustered	0	STK11IP	2	0	1	0	0.48172	FALSE	0	STK11IP	0	0
3.16129	0.0358513	0.316327	0	up	3	9	FALSE		Unclustered	0.5	SMAD5	8.33333	0	3	0	0.855914	FALSE	0	SMAD5	374	0.385965
3.72581	0	0.268398	0	up	1	10	FALSE		Unclustered	0	LASP1	12	0	1	0	0.81828	FALSE	0	LASP1	0	0
3.96774	0	0.252033	0	up	1	10	FALSE		Unclustered	0	ZBTB4	5	0	1	0	0.802151	FALSE	0	ZBTB4	0	0
3.59677	0.0221311	0.278027	0.333333	up	3	10	FALSE		Unclustered	2	SKI	5	0	3	0	0.826882	FALSE	0	SKI	130	0.424242
4.33871	0	0.230483	0	up	1	7	FALSE		Unclustered	0	PIP4K2C	6	0	1	0	0.777419	FALSE	0	PIP4K2C	0	0
1	0	1	0	up	1	1	FALSE		Unclustered	0	PPP6R3	1	0	1	0	1	FALSE	0	PPP6R3	0	0
1	0	1	0	up	1	1	FALSE		Unclustered	0	RPA2	1	0	1	0	1	FALSE	0	RPA2	0	0
4.1129	0	0.243137	0	up	1	10	FALSE		Unclustered	0	PRRX1	6	0	1	0	0.792473	FALSE	0	PRRX1	0	0
1	0	1	0	up	1	1	FALSE		Unclustered	0	RAB12	1	0	1	0	1	FALSE	0	RAB12	0	0
1	0	1	0	up	1	1	FALSE		Unclustered	0	RAB30	1	0	1	0	1	FALSE	0	RAB30	0	0
1	0	1	0	up	1	1	FALSE		Unclustered	0	RUNDC1	1	0	1	0	1	FALSE	0	RUNDC1	0	0
1	0	1	0	up	1	1	FALSE		Unclustered	0	TNFAIP1	1	0	1	0	1	FALSE	0	TNFAIP1	0	0
5.91935	0.0936013	0.168937	0	up	2	9	FALSE		Unclustered	0.666667	ZNF385A	2	0	2	0	0.672043	FALSE	0	ZNF385A	684	0.5
3.72581	0	0.268398	0	up	1	10	FALSE		Unclustered	0	SOX4	12	0	1	0	0.81828	FALSE	0	SOX4	0	0
4.62903	0	0.216028	1	up	2	8	FALSE		Unclustered	2	STX6	3.5	0	2	0	0.758065	FALSE	0	STX6	0	0.7
4.62903	0	0.216028	1	up	2	8	FALSE		Unclustered	2	VTI1A	3.5	0	2	0	0.758065	FALSE	0	VTI1A	0	0.7
4.08065	0.0322581	0.245059	0	up	2	10	FALSE		Unclustered	0.666667	ZRANB1	3.5	0	2	0	0.794624	FALSE	0	ZRANB1	196	0.5
5.06452	0	0.197452	0	up	1	11	FALSE		Unclustered	0	YOD1	2	0	1	0	0.729032	FALSE	0	YOD1	0	0

## Sheet: Supplementary table 3
Supplementary table 3 gsea_report_for_High_ITCH
NAME	GS<br> follow link to MSigDB	GS DETAILS	SIZE	ES	NES	NOM p-val	FDR q-val	FWER p-val	RANK AT MAX	LEADING EDGE
KEGG_ADHERENS_JUNCTION	KEGG_ADHERENS_JUNCTION		68	0.284614	1.02644	0.455882	1	1	5741	tags=35%, list=28%, signal=49%
KEGG_WNT_SIGNALING_PATHWAY	KEGG_WNT_SIGNALING_PATHWAY		149	0.300978	1.02234	0.42161	1	1	3504	tags=22%, list=17%, signal=27%
KEGG_TGF_BETA_SIGNALING_PATHWAY	KEGG_TGF_BETA_SIGNALING_PATHWAY		85	0.31199	0.950251	0.544747	0.984886	1	4921	tags=32%, list=24%, signal=42%
KEGG_NON_SMALL_CELL_LUNG_CANCER	KEGG_NON_SMALL_CELL_LUNG_CANCER		54	0.235993	0.830353	0.639442	1	1	3377	tags=22%, list=16%, signal=27%
KEGG_MISMATCH_REPAIR	KEGG_MISMATCH_REPAIR		23	0.265385	0.761571	0.670082	0.947854	1	2379	tags=13%, list=12%, signal=15%
KEGG_DRUG_METABOLISM_OTHER_ENZYMES	KEGG_DRUG_METABOLISM_OTHER_ENZYMES		49	0.32329	0.734946	0.820158	0.926239	1	2914	tags=20%, list=14%, signal=24%
KEGG_CELL_ADHESION_MOLECULES_CAMS	KEGG_CELL_ADHESION_MOLECULES_CAMS		128	0.249256	0.590045	0.92016	0.979246	1	2853	tags=20%, list=14%, signal=23%
KEGG_SMALL_CELL_LUNG_CANCER	KEGG_SMALL_CELL_LUNG_CANCER		84	0.158484	0.552003	0.957746	0.988825	1	6201	tags=29%, list=30%, signal=41%
KEGG_N_GLYCAN_BIOSYNTHESIS	KEGG_N_GLYCAN_BIOSYNTHESIS	Details ...	46	0.395233	1.67539	0.0244399	1	0.487	4351	tags=28%, list=21%, signal=36%
KEGG_OTHER_GLYCAN_DEGRADATION	KEGG_OTHER_GLYCAN_DEGRADATION	Details ...	16	0.589628	1.66186	0.0301811	0.617588	0.518	3799	tags=38%, list=19%, signal=46%
KEGG_NICOTINATE_AND_NICOTINAMIDE_METABOLISM	KEGG_NICOTINATE_AND_NICOTINAMIDE_METABOLISM	Details ...	22	0.618714	1.60177	0.0117188	0.633393	0.663	1290	tags=32%, list=6%, signal=34%
KEGG_BASAL_TRANSCRIPTION_FACTORS	KEGG_BASAL_TRANSCRIPTION_FACTORS	Details ...	35	0.433814	1.58487	0.0478012	0.528741	0.698	6189	tags=43%, list=30%, signal=61%
KEGG_LYSINE_DEGRADATION	KEGG_LYSINE_DEGRADATION	Details ...	39	0.407403	1.54679	0.0662651	0.544198	0.773	3244	tags=18%, list=16%, signal=21%
KEGG_PEROXISOME	KEGG_PEROXISOME	Details ...	77	0.45252	1.5185	0.0770751	0.55121	0.816	3759	tags=30%, list=18%, signal=36%
KEGG_UBIQUITIN_MEDIATED_PROTEOLYSIS	KEGG_UBIQUITIN_MEDIATED_PROTEOLYSIS	Details ...	130	0.228923	1.43621	0.100193	0.772567	0.903	6912	tags=34%, list=34%, signal=51%
KEGG_STEROID_BIOSYNTHESIS	KEGG_STEROID_BIOSYNTHESIS	Details ...	15	0.553378	1.42865	0.11359	0.702511	0.908	2085	tags=20%, list=10%, signal=22%
KEGG_SELENOAMINO_ACID_METABOLISM	KEGG_SELENOAMINO_ACID_METABOLISM	Details ...	24	0.467978	1.41998	0.126953	0.655511	0.916	3800	tags=29%, list=19%, signal=36%
KEGG_RENIN_ANGIOTENSIN_SYSTEM	KEGG_RENIN_ANGIOTENSIN_SYSTEM	Details ...	17	0.633393	1.40279	0.0803213	0.65022	0.933	5374	tags=53%, list=26%, signal=72%
KEGG_PROPANOATE_METABOLISM	KEGG_PROPANOATE_METABOLISM	Details ...	31	0.432107	1.36571	0.144033	0.716259	0.952	3825	tags=26%, list=19%, signal=32%
KEGG_GLYCOSYLPHOSPHATIDYLINOSITOL_GPI_ANCHOR_BIOSYNTHESIS	KEGG_GLYCOSYLPHOSPHATIDYLINOSITOL_GPI_ANCHOR_BIOSYNTHESIS	Details ...	25	0.374745	1.29898	0.2	0.897144	0.979	3626	tags=24%, list=18%, signal=29%
KEGG_PROXIMAL_TUBULE_BICARBONATE_RECLAMATION	KEGG_PROXIMAL_TUBULE_BICARBONATE_RECLAMATION	Details ...	23	0.51361	1.26858	0.164179	0.944971	0.989	3035	tags=35%, list=15%, signal=41%
KEGG_THYROID_CANCER	KEGG_THYROID_CANCER	Details ...	29	0.352732	1.25265	0.205628	0.936694	0.993	4073	tags=28%, list=20%, signal=34%
KEGG_PRIMARY_BILE_ACID_BIOSYNTHESIS	KEGG_PRIMARY_BILE_ACID_BIOSYNTHESIS	Details ...	16	0.570788	1.2467	0.192015	0.896629	0.993	4838	tags=56%, list=24%, signal=74%
KEGG_PPAR_SIGNALING_PATHWAY	KEGG_PPAR_SIGNALING_PATHWAY	Details ...	69	0.42687	1.19981	0.208661	1	0.994	4002	tags=33%, list=19%, signal=41%
KEGG_INSULIN_SIGNALING_PATHWAY	KEGG_INSULIN_SIGNALING_PATHWAY	Details ...	137	0.291016	1.18789	0.216599	0.984293	0.994	2802	tags=15%, list=14%, signal=17%
KEGG_PYRUVATE_METABOLISM	KEGG_PYRUVATE_METABOLISM	Details ...	39	0.363456	1.16371	0.241107	1	0.997	3825	tags=23%, list=19%, signal=28%
KEGG_ADIPOCYTOKINE_SIGNALING_PATHWAY	KEGG_ADIPOCYTOKINE_SIGNALING_PATHWAY	Details ...	67	0.349675	1.11377	0.32636	1	1	4389	tags=22%, list=21%, signal=28%
KEGG_CITRATE_CYCLE_TCA_CYCLE	KEGG_CITRATE_CYCLE_TCA_CYCLE	Details ...	30	0.370281	1.11234	0.353066	1	1	608	tags=7%, list=3%, signal=7%
KEGG_GAP_JUNCTION	KEGG_GAP_JUNCTION		85	0.359747	1.09709	0.378543	1	1	3519	tags=28%, list=17%, signal=34%
KEGG_DORSO_VENTRAL_AXIS_FORMATION	KEGG_DORSO_VENTRAL_AXIS_FORMATION		24	0.37929	1.09279	0.35259	1	1	5897	tags=42%, list=29%, signal=58%
KEGG_MTOR_SIGNALING_PATHWAY	KEGG_MTOR_SIGNALING_PATHWAY		51	0.300071	1.0702	0.405738	1	1	4612	tags=22%, list=22%, signal=28%
KEGG_CYSTEINE_AND_METHIONINE_METABOLISM	KEGG_CYSTEINE_AND_METHIONINE_METABOLISM		34	0.344715	1.066	0.367387	1	1	4795	tags=29%, list=23%, signal=38%
KEGG_ENDOMETRIAL_CANCER	KEGG_ENDOMETRIAL_CANCER		52	0.27219	1.03332	0.436255	1	1	3377	tags=23%, list=16%, signal=28%
KEGG_VASCULAR_SMOOTH_MUSCLE_CONTRACTION	KEGG_VASCULAR_SMOOTH_MUSCLE_CONTRACTION		111	0.351965	1.00874	0.435583	1	1	2873	tags=25%, list=14%, signal=29%
KEGG_OOCYTE_MEIOSIS	KEGG_OOCYTE_MEIOSIS		110	0.241128	0.993021	0.447791	1	1	3616	tags=18%, list=18%, signal=22%
KEGG_HEDGEHOG_SIGNALING_PATHWAY	KEGG_HEDGEHOG_SIGNALING_PATHWAY		56	0.381738	0.990107	0.495885	1	1	3316	tags=30%, list=16%, signal=36%
KEGG_PANTOTHENATE_AND_COA_BIOSYNTHESIS	KEGG_PANTOTHENATE_AND_COA_BIOSYNTHESIS		16	0.419497	0.989087	0.485944	1	1	788	tags=19%, list=4%, signal=19%
KEGG_GLYCINE_SERINE_AND_THREONINE_METABOLISM	KEGG_GLYCINE_SERINE_AND_THREONINE_METABOLISM		31	0.390624	0.964531	0.499048	1	1	2599	tags=26%, list=13%, signal=30%
KEGG_LONG_TERM_POTENTIATION	KEGG_LONG_TERM_POTENTIATION		69	0.302869	0.964328	0.508946	1	1	3377	tags=25%, list=16%, signal=29%
KEGG_PROGESTERONE_MEDIATED_OOCYTE_MATURATION	KEGG_PROGESTERONE_MEDIATED_OOCYTE_MATURATION		85	0.270811	0.950382	0.52834	1	1	4820	tags=27%, list=23%, signal=35%
KEGG_STARCH_AND_SUCROSE_METABOLISM	KEGG_STARCH_AND_SUCROSE_METABOLISM		49	0.37485	0.914644	0.575	1	1	3498	tags=24%, list=17%, signal=29%
KEGG_TIGHT_JUNCTION	KEGG_TIGHT_JUNCTION		128	0.25974	0.894704	0.62963	1	1	3519	tags=20%, list=17%, signal=23%
KEGG_MELANOMA	KEGG_MELANOMA		71	0.315321	0.884972	0.621782	1	1	4413	tags=35%, list=21%, signal=45%
KEGG_AXON_GUIDANCE	KEGG_AXON_GUIDANCE		127	0.299012	0.874006	0.645361	1	1	3467	tags=25%, list=17%, signal=30%
KEGG_BIOSYNTHESIS_OF_UNSATURATED_FATTY_ACIDS	KEGG_BIOSYNTHESIS_OF_UNSATURATED_FATTY_ACIDS		20	0.317302	0.871612	0.600832	1	1	4496	tags=25%, list=22%, signal=32%
KEGG_ARACHIDONIC_ACID_METABOLISM	KEGG_ARACHIDONIC_ACID_METABOLISM		57	0.322032	0.859031	0.701195	1	1	307	tags=11%, list=1%, signal=11%
KEGG_GLYCOLYSIS_GLUCONEOGENESIS	KEGG_GLYCOLYSIS_GLUCONEOGENESIS		61	0.25941	0.848681	0.691532	1	1	3825	tags=23%, list=19%, signal=28%
KEGG_MELANOGENESIS	KEGG_MELANOGENESIS		101	0.279459	0.834926	0.727835	1	1	3377	tags=27%, list=16%, signal=32%
KEGG_ERBB_SIGNALING_PATHWAY	KEGG_ERBB_SIGNALING_PATHWAY		86	0.228904	0.827099	0.650406	1	1	3772	tags=21%, list=18%, signal=26%
KEGG_COMPLEMENT_AND_COAGULATION_CASCADES	KEGG_COMPLEMENT_AND_COAGULATION_CASCADES		68	0.37089	0.825202	0.709419	0.998188	1	2231	tags=24%, list=11%, signal=26%
KEGG_BASAL_CELL_CARCINOMA	KEGG_BASAL_CELL_CARCINOMA		55	0.316202	0.821419	0.720524	0.984649	1	2586	tags=25%, list=13%, signal=29%
KEGG_FATTY_ACID_METABOLISM	KEGG_FATTY_ACID_METABOLISM		40	0.285173	0.815759	0.664717	0.97602	1	3759	tags=20%, list=18%, signal=24%
KEGG_VALINE_LEUCINE_AND_ISOLEUCINE_DEGRADATION	KEGG_VALINE_LEUCINE_AND_ISOLEUCINE_DEGRADATION		43	0.242611	0.808397	0.688935	0.970429	1	428	tags=5%, list=2%, signal=5%
KEGG_TRYPTOPHAN_METABOLISM	KEGG_TRYPTOPHAN_METABOLISM		38	0.300905	0.800613	0.762745	0.966177	1	1573	tags=13%, list=8%, signal=14%
KEGG_CALCIUM_SIGNALING_PATHWAY	KEGG_CALCIUM_SIGNALING_PATHWAY		176	0.299099	0.794775	0.77459	0.958133	1	3190	tags=26%, list=16%, signal=30%
KEGG_ARRHYTHMOGENIC_RIGHT_VENTRICULAR_CARDIOMYOPATHY_ARVC	KEGG_ARRHYTHMOGENIC_RIGHT_VENTRICULAR_CARDIOMYOPATHY_ARVC		74	0.297428	0.766484	0.765873	0.993624	1	4417	tags=27%, list=22%, signal=34%
KEGG_NEUROACTIVE_LIGAND_RECEPTOR_INTERACTION	KEGG_NEUROACTIVE_LIGAND_RECEPTOR_INTERACTION		270	0.301595	0.765944	0.845098	0.976105	1	3212	tags=25%, list=16%, signal=29%
KEGG_MATURITY_ONSET_DIABETES_OF_THE_YOUNG	KEGG_MATURITY_ONSET_DIABETES_OF_THE_YOUNG		25	0.320197	0.7616	0.789784	0.96536	1	1909	tags=20%, list=9%, signal=22%
KEGG_ECM_RECEPTOR_INTERACTION	KEGG_ECM_RECEPTOR_INTERACTION		83	0.31629	0.750184	0.762994	0.950178	1	4921	tags=31%, list=24%, signal=41%
KEGG_ENDOCYTOSIS	KEGG_ENDOCYTOSIS		175	0.178529	0.746472	0.81405	0.93979	1	3519	tags=14%, list=17%, signal=17%
KEGG_LONG_TERM_DEPRESSION	KEGG_LONG_TERM_DEPRESSION		66	0.259306	0.73551	0.864754	0.941367	1	2701	tags=18%, list=13%, signal=21%
KEGG_PENTOSE_AND_GLUCURONATE_INTERCONVERSIONS	KEGG_PENTOSE_AND_GLUCURONATE_INTERCONVERSIONS		26	0.352689	0.726416	0.799611	0.924245	1	3408	tags=27%, list=17%, signal=32%
KEGG_DILATED_CARDIOMYOPATHY	KEGG_DILATED_CARDIOMYOPATHY		90	0.271359	0.688331	0.888438	0.964636	1	3441	tags=23%, list=17%, signal=28%
KEGG_PENTOSE_PHOSPHATE_PATHWAY	KEGG_PENTOSE_PHOSPHATE_PATHWAY		26	0.217016	0.683631	0.860324	0.954907	1	4855	tags=27%, list=24%, signal=35%
KEGG_NEUROTROPHIN_SIGNALING_PATHWAY	KEGG_NEUROTROPHIN_SIGNALING_PATHWAY		125	0.183313	0.670878	0.831276	0.956822	1	3960	tags=18%, list=19%, signal=23%
KEGG_FOCAL_ADHESION	KEGG_FOCAL_ADHESION		196	0.226161	0.659584	0.831967	0.955392	1	4473	tags=23%, list=22%, signal=29%
KEGG_ACUTE_MYELOID_LEUKEMIA	KEGG_ACUTE_MYELOID_LEUKEMIA		57	0.195672	0.646758	0.80202	0.955191	1	3772	tags=18%, list=18%, signal=21%
KEGG_HYPERTROPHIC_CARDIOMYOPATHY_HCM	KEGG_HYPERTROPHIC_CARDIOMYOPATHY_HCM		83	0.25236	0.64191	0.949393	0.945799	1	4410	tags=25%, list=21%, signal=32%
KEGG_PROTEIN_EXPORT	KEGG_PROTEIN_EXPORT		22	0.178442	0.543974	0.954545	0.978452	1	1100	tags=5%, list=5%, signal=5%
KEGG_STEROID_HORMONE_BIOSYNTHESIS	KEGG_STEROID_HORMONE_BIOSYNTHESIS		54	0.213815	0.494963	1	0.983715	1	3882	tags=22%, list=19%, signal=27%

## Sheet: Supplementary table 4
Supplementary table 4 gsea_report_for_LOW_ITCH
NAME	GS<br> follow link to MSigDB	GS DETAILS	SIZE	ES	NES	NOM p-val	FDR q-val	FWER p-val	RANK AT MAX	LEADING EDGE
KEGG_OXIDATIVE_PHOSPHORYLATION	KEGG_OXIDATIVE_PHOSPHORYLATION	Details ...	101	-0.431108	-1.57025	0.0899796	1	0.739	7074	tags=56%, list=34%, signal=86%
KEGG_ANTIGEN_PROCESSING_AND_PRESENTATION	KEGG_ANTIGEN_PROCESSING_AND_PRESENTATION	Details ...	80	-0.619282	-1.56905	0.0383065	1	0.743	3852	tags=48%, list=19%, signal=58%
KEGG_GLYCOSPHINGOLIPID_BIOSYNTHESIS_LACTO_AND_NEOLACTO_SERIES	KEGG_GLYCOSPHINGOLIPID_BIOSYNTHESIS_LACTO_AND_NEOLACTO_SERIES	Details ...	25	-0.579776	-1.51187	0.029703	1	0.847	3699	tags=28%, list=18%, signal=34%
KEGG_NATURAL_KILLER_CELL_MEDIATED_CYTOTOXICITY	KEGG_NATURAL_KILLER_CELL_MEDIATED_CYTOTOXICITY	Details ...	131	-0.570398	-1.50533	0.0662651	1	0.851	3074	tags=41%, list=15%, signal=48%
KEGG_CYTOSOLIC_DNA_SENSING_PATHWAY	KEGG_CYTOSOLIC_DNA_SENSING_PATHWAY	Details ...	54	-0.465156	-1.41439	0.0935673	1	0.941	3709	tags=31%, list=18%, signal=38%
KEGG_PARKINSONS_DISEASE	KEGG_PARKINSONS_DISEASE	Details ...	99	-0.372505	-1.40331	0.124752	1	0.948	7003	tags=56%, list=34%, signal=84%
KEGG_P53_SIGNALING_PATHWAY	KEGG_P53_SIGNALING_PATHWAY	Details ...	65	-0.334948	-1.34941	0.112903	1	0.972	5222	tags=32%, list=25%, signal=43%
KEGG_PYRIMIDINE_METABOLISM	KEGG_PYRIMIDINE_METABOLISM	Details ...	95	-0.302201	-1.34912	0.113503	1	0.972	5666	tags=39%, list=28%, signal=54%
KEGG_RIG_I_LIKE_RECEPTOR_SIGNALING_PATHWAY	KEGG_RIG_I_LIKE_RECEPTOR_SIGNALING_PATHWAY	Details ...	68	-0.371939	-1.31288	0.142857	1	0.976	3518	tags=22%, list=17%, signal=27%
KEGG_GRAFT_VERSUS_HOST_DISEASE	KEGG_GRAFT_VERSUS_HOST_DISEASE	Details ...	37	-0.680222	-1.31285	0.180556	1	0.976	4116	tags=70%, list=20%, signal=88%
KEGG_VEGF_SIGNALING_PATHWAY	KEGG_VEGF_SIGNALING_PATHWAY	Details ...	74	-0.410247	-1.29026	0.160966	1	0.981	2721	tags=30%, list=13%, signal=34%
KEGG_O_GLYCAN_BIOSYNTHESIS	KEGG_O_GLYCAN_BIOSYNTHESIS	Details ...	26	-0.492597	-1.27265	0.225869	1	0.983	3372	tags=35%, list=16%, signal=41%
KEGG_BASE_EXCISION_REPAIR	KEGG_BASE_EXCISION_REPAIR	Details ...	33	-0.367939	-1.24354	0.261905	1	0.987	6060	tags=52%, list=30%, signal=73%
KEGG_FRUCTOSE_AND_MANNOSE_METABOLISM	KEGG_FRUCTOSE_AND_MANNOSE_METABOLISM	Details ...	32	-0.38409	-1.24008	0.215321	1	0.987	5142	tags=47%, list=25%, signal=62%
KEGG_PROTEASOME	KEGG_PROTEASOME	Details ...	43	-0.396574	-1.22888	0.291089	1	0.992	6447	tags=47%, list=31%, signal=68%
KEGG_NITROGEN_METABOLISM	KEGG_NITROGEN_METABOLISM	Details ...	23	-0.520439	-1.22857	0.199219	1	0.992	1285	tags=26%, list=6%, signal=28%
KEGG_INTESTINAL_IMMUNE_NETWORK_FOR_IGA_PRODUCTION	KEGG_INTESTINAL_IMMUNE_NETWORK_FOR_IGA_PRODUCTION	Details ...	46	-0.60366	-1.21007	0.281314	1	0.994	4269	tags=61%, list=21%, signal=77%
KEGG_HUNTINGTONS_DISEASE	KEGG_HUNTINGTONS_DISEASE	Details ...	160	-0.250618	-1.20901	0.194831	1	0.994	6320	tags=40%, list=31%, signal=57%
KEGG_HISTIDINE_METABOLISM	KEGG_HISTIDINE_METABOLISM	Details ...	27	-0.444325	-1.19094	0.229008	1	0.995	907	tags=19%, list=4%, signal=19%
KEGG_ALZHEIMERS_DISEASE	KEGG_ALZHEIMERS_DISEASE	Details ...	144	-0.264718	-1.18383	0.216495	1	0.995	5285	tags=34%, list=26%, signal=46%
KEGG_PATHOGENIC_ESCHERICHIA_COLI_INFECTION	KEGG_PATHOGENIC_ESCHERICHIA_COLI_INFECTION		53	-0.311059	-1.16388	0.287755	1	0.996	4550	tags=28%, list=22%, signal=36%
KEGG_ONE_CARBON_POOL_BY_FOLATE	KEGG_ONE_CARBON_POOL_BY_FOLATE		17	-0.422191	-1.15533	0.279297	1	0.997	4971	tags=59%, list=24%, signal=78%
KEGG_AMINO_SUGAR_AND_NUCLEOTIDE_SUGAR_METABOLISM	KEGG_AMINO_SUGAR_AND_NUCLEOTIDE_SUGAR_METABOLISM		42	-0.325084	-1.15335	0.322581	1	0.997	5975	tags=45%, list=29%, signal=64%
KEGG_BLADDER_CANCER	KEGG_BLADDER_CANCER		40	-0.323532	-1.14792	0.280992	1	0.997	2712	tags=23%, list=13%, signal=26%
KEGG_RIBOSOME	KEGG_RIBOSOME		87	-0.399331	-1.14094	0.385214	1	0.998	8418	tags=74%, list=41%, signal=124%
KEGG_GLIOMA	KEGG_GLIOMA		65	-0.338059	-1.1269	0.341797	1	0.999	2634	tags=23%, list=13%, signal=26%
KEGG_AUTOIMMUNE_THYROID_DISEASE	KEGG_AUTOIMMUNE_THYROID_DISEASE		50	-0.488302	-1.11056	0.361277	1	0.999	4116	tags=46%, list=20%, signal=57%
KEGG_GLYCOSAMINOGLYCAN_DEGRADATION	KEGG_GLYCOSAMINOGLYCAN_DEGRADATION		21	-0.405355	-1.08884	0.372816	1	1	605	tags=10%, list=3%, signal=10%
KEGG_GLYCEROPHOSPHOLIPID_METABOLISM	KEGG_GLYCEROPHOSPHOLIPID_METABOLISM		70	-0.29815	-1.0735	0.318367	1	1	2721	tags=24%, list=13%, signal=28%
KEGG_ETHER_LIPID_METABOLISM	KEGG_ETHER_LIPID_METABOLISM		29	-0.389304	-1.06236	0.373225	1	1	2721	tags=34%, list=13%, signal=40%
KEGG_VIBRIO_CHOLERAE_INFECTION	KEGG_VIBRIO_CHOLERAE_INFECTION		53	-0.264725	-1.05383	0.374245	1	1	2283	tags=13%, list=11%, signal=15%
KEGG_ALPHA_LINOLENIC_ACID_METABOLISM	KEGG_ALPHA_LINOLENIC_ACID_METABOLISM		18	-0.436231	-1.04294	0.402923	1	1	2721	tags=39%, list=13%, signal=45%
KEGG_TYPE_I_DIABETES_MELLITUS	KEGG_TYPE_I_DIABETES_MELLITUS		41	-0.475982	-1.03021	0.452941	1	1	4116	tags=51%, list=20%, signal=64%
KEGG_VASOPRESSIN_REGULATED_WATER_REABSORPTION	KEGG_VASOPRESSIN_REGULATED_WATER_REABSORPTION		44	-0.29693	-1.02709	0.434442	1	1	2013	tags=11%, list=10%, signal=13%
KEGG_GNRH_SIGNALING_PATHWAY	KEGG_GNRH_SIGNALING_PATHWAY		100	-0.297822	-1.02611	0.403361	1	1	2721	tags=21%, list=13%, signal=24%
KEGG_LEISHMANIA_INFECTION	KEGG_LEISHMANIA_INFECTION		70	-0.458222	-1.02093	0.459514	1	1	3852	tags=41%, list=19%, signal=51%
KEGG_LINOLEIC_ACID_METABOLISM	KEGG_LINOLEIC_ACID_METABOLISM		28	-0.444652	-1.01965	0.438697	1	1	3264	tags=46%, list=16%, signal=55%
KEGG_PHENYLALANINE_METABOLISM	KEGG_PHENYLALANINE_METABOLISM		17	-0.418123	-0.997962	0.45674	1	1	2878	tags=41%, list=14%, signal=48%
KEGG_ARGININE_AND_PROLINE_METABOLISM	KEGG_ARGININE_AND_PROLINE_METABOLISM		51	-0.310238	-0.975091	0.466535	1	1	4612	tags=33%, list=22%, signal=43%
KEGG_FC_EPSILON_RI_SIGNALING_PATHWAY	KEGG_FC_EPSILON_RI_SIGNALING_PATHWAY		78	-0.332211	-0.97366	0.488978	1	1	2721	tags=23%, list=13%, signal=27%
KEGG_TYROSINE_METABOLISM	KEGG_TYROSINE_METABOLISM		40	-0.372323	-0.968703	0.518887	1	1	2878	tags=33%, list=14%, signal=38%
KEGG_BUTANOATE_METABOLISM	KEGG_BUTANOATE_METABOLISM		34	-0.344735	-0.964788	0.475309	1	1	4906	tags=35%, list=24%, signal=46%
KEGG_PHOSPHATIDYLINOSITOL_SIGNALING_SYSTEM	KEGG_PHOSPHATIDYLINOSITOL_SIGNALING_SYSTEM		76	-0.256938	-0.964671	0.511202	1	1	3224	tags=21%, list=16%, signal=25%
KEGG_B_CELL_RECEPTOR_SIGNALING_PATHWAY	KEGG_B_CELL_RECEPTOR_SIGNALING_PATHWAY		74	-0.340669	-0.957454	0.530364	1	1	3923	tags=32%, list=19%, signal=40%
KEGG_ASTHMA	KEGG_ASTHMA		28	-0.475197	-0.936221	0.574257	1	1	3852	tags=50%, list=19%, signal=61%
KEGG_PANCREATIC_CANCER	KEGG_PANCREATIC_CANCER		69	-0.258591	-0.936045	0.552632	1	1	4157	tags=22%, list=20%, signal=27%
KEGG_SYSTEMIC_LUPUS_ERYTHEMATOSUS	KEGG_SYSTEMIC_LUPUS_ERYTHEMATOSUS		54	-0.459188	-0.935274	0.578512	1	1	4121	tags=48%, list=20%, signal=60%
KEGG_GLYCEROLIPID_METABOLISM	KEGG_GLYCEROLIPID_METABOLISM		43	-0.280256	-0.931792	0.567669	1	1	3271	tags=28%, list=16%, signal=33%
KEGG_SPHINGOLIPID_METABOLISM	KEGG_SPHINGOLIPID_METABOLISM		36	-0.293707	-0.928765	0.537678	1	1	2573	tags=19%, list=13%, signal=22%
KEGG_TERPENOID_BACKBONE_BIOSYNTHESIS	KEGG_TERPENOID_BACKBONE_BIOSYNTHESIS		15	-0.383801	-0.922442	0.535787	1	1	8317	tags=67%, list=41%, signal=112%
KEGG_ALANINE_ASPARTATE_AND_GLUTAMATE_METABOLISM	KEGG_ALANINE_ASPARTATE_AND_GLUTAMATE_METABOLISM		30	-0.322259	-0.922043	0.566929	1	1	2135	tags=20%, list=10%, signal=22%
KEGG_NOTCH_SIGNALING_PATHWAY	KEGG_NOTCH_SIGNALING_PATHWAY		47	-0.243123	-0.917549	0.545631	1	1	5959	tags=30%, list=29%, signal=42%
KEGG_VIRAL_MYOCARDITIS	KEGG_VIRAL_MYOCARDITIS		68	-0.373179	-0.916089	0.596708	1	1	4116	tags=35%, list=20%, signal=44%
KEGG_APOPTOSIS	KEGG_APOPTOSIS		86	-0.267123	-0.913609	0.552147	1	1	4164	tags=28%, list=20%, signal=35%
KEGG_MAPK_SIGNALING_PATHWAY	KEGG_MAPK_SIGNALING_PATHWAY		263	-0.272047	-0.908027	0.594262	1	1	2891	tags=19%, list=14%, signal=22%
KEGG_HEMATOPOIETIC_CELL_LINEAGE	KEGG_HEMATOPOIETIC_CELL_LINEAGE		84	-0.421332	-0.902812	0.608871	1	1	4078	tags=38%, list=20%, signal=47%
KEGG_BETA_ALANINE_METABOLISM	KEGG_BETA_ALANINE_METABOLISM		22	-0.347562	-0.902612	0.57451	1	1	3082	tags=23%, list=15%, signal=27%
KEGG_ALLOGRAFT_REJECTION	KEGG_ALLOGRAFT_REJECTION		35	-0.461294	-0.900594	0.607287	1	1	4116	tags=51%, list=20%, signal=64%
KEGG_CELL_CYCLE	KEGG_CELL_CYCLE		118	-0.212541	-0.898064	0.53507	0.994499	1	5855	tags=32%, list=29%, signal=45%
KEGG_INOSITOL_PHOSPHATE_METABOLISM	KEGG_INOSITOL_PHOSPHATE_METABOLISM		54	-0.234983	-0.886863	0.574899	1	1	4426	tags=28%, list=22%, signal=35%
KEGG_TOLL_LIKE_RECEPTOR_SIGNALING_PATHWAY	KEGG_TOLL_LIKE_RECEPTOR_SIGNALING_PATHWAY		101	-0.324064	-0.883632	0.589178	0.994558	1	3307	tags=22%, list=16%, signal=26%
KEGG_COLORECTAL_CANCER	KEGG_COLORECTAL_CANCER		62	-0.246235	-0.876357	0.610204	0.994461	1	4195	tags=24%, list=20%, signal=30%
KEGG_AMYOTROPHIC_LATERAL_SCLEROSIS_ALS	KEGG_AMYOTROPHIC_LATERAL_SCLEROSIS_ALS		52	-0.290675	-0.861118	0.620833	1	1	5141	tags=33%, list=25%, signal=44%
KEGG_CHRONIC_MYELOID_LEUKEMIA	KEGG_CHRONIC_MYELOID_LEUKEMIA		73	-0.206518	-0.843816	0.618395	1	1	4157	tags=21%, list=20%, signal=26%
KEGG_LYSOSOME	KEGG_LYSOSOME		119	-0.194644	-0.831981	0.613636	1	1	4725	tags=19%, list=23%, signal=25%
KEGG_TYPE_II_DIABETES_MELLITUS	KEGG_TYPE_II_DIABETES_MELLITUS		46	-0.301023	-0.826866	0.710843	1	1	2511	tags=24%, list=12%, signal=27%
KEGG_PORPHYRIN_AND_CHLOROPHYLL_METABOLISM	KEGG_PORPHYRIN_AND_CHLOROPHYLL_METABOLISM		39	-0.335429	-0.822754	0.686538	1	1	4953	tags=44%, list=24%, signal=57%
KEGG_CYTOKINE_CYTOKINE_RECEPTOR_INTERACTION	KEGG_CYTOKINE_CYTOKINE_RECEPTOR_INTERACTION		258	-0.328459	-0.815925	0.70297	1	1	3307	tags=28%, list=16%, signal=33%
KEGG_FC_GAMMA_R_MEDIATED_PHAGOCYTOSIS	KEGG_FC_GAMMA_R_MEDIATED_PHAGOCYTOSIS		92	-0.272704	-0.809089	0.644578	1	1	4999	tags=34%, list=24%, signal=44%
KEGG_PRIMARY_IMMUNODEFICIENCY	KEGG_PRIMARY_IMMUNODEFICIENCY		35	-0.389192	-0.809018	0.675565	1	1	4269	tags=40%, list=21%, signal=50%
KEGG_T_CELL_RECEPTOR_SIGNALING_PATHWAY	KEGG_T_CELL_RECEPTOR_SIGNALING_PATHWAY		106	-0.302257	-0.799179	0.682672	1	1	3128	tags=23%, list=15%, signal=27%
KEGG_PURINE_METABOLISM	KEGG_PURINE_METABOLISM		148	-0.200235	-0.791122	0.817822	1	1	4347	tags=27%, list=21%, signal=34%
KEGG_ALDOSTERONE_REGULATED_SODIUM_REABSORPTION	KEGG_ALDOSTERONE_REGULATED_SODIUM_REABSORPTION		42	-0.287207	-0.782454	0.766393	1	1	3419	tags=24%, list=17%, signal=29%
KEGG_PRION_DISEASES	KEGG_PRION_DISEASES		35	-0.313343	-0.780357	0.776699	1	1	4741	tags=37%, list=23%, signal=48%
KEGG_NOD_LIKE_RECEPTOR_SIGNALING_PATHWAY	KEGG_NOD_LIKE_RECEPTOR_SIGNALING_PATHWAY		60	-0.296808	-0.773086	0.727811	1	1	1339	tags=13%, list=7%, signal=14%
KEGG_ABC_TRANSPORTERS	KEGG_ABC_TRANSPORTERS		44	-0.28219	-0.767297	0.83	1	1	1192	tags=16%, list=6%, signal=17%
KEGG_GALACTOSE_METABOLISM	KEGG_GALACTOSE_METABOLISM		26	-0.26097	-0.762872	0.795322	1	1	5299	tags=46%, list=26%, signal=62%
KEGG_PROSTATE_CANCER	KEGG_PROSTATE_CANCER		89	-0.203877	-0.754318	0.739754	1	1	4193	tags=22%, list=20%, signal=28%
KEGG_TASTE_TRANSDUCTION	KEGG_TASTE_TRANSDUCTION		50	-0.287937	-0.731531	0.894	1	1	2342	tags=22%, list=11%, signal=25%
KEGG_REGULATION_OF_AUTOPHAGY	KEGG_REGULATION_OF_AUTOPHAGY		34	-0.227741	-0.731154	0.818182	1	1	4248	tags=18%, list=21%, signal=22%
KEGG_METABOLISM_OF_XENOBIOTICS_BY_CYTOCHROME_P450	KEGG_METABOLISM_OF_XENOBIOTICS_BY_CYTOCHROME_P450		69	-0.306705	-0.720807	0.851923	1	1	3755	tags=30%, list=18%, signal=37%
KEGG_EPITHELIAL_CELL_SIGNALING_IN_HELICOBACTER_PYLORI_INFECTION	KEGG_EPITHELIAL_CELL_SIGNALING_IN_HELICOBACTER_PYLORI_INFECTION		67	-0.196727	-0.711195	0.797189	1	1	3426	tags=15%, list=17%, signal=18%
KEGG_AMINOACYL_TRNA_BIOSYNTHESIS	KEGG_AMINOACYL_TRNA_BIOSYNTHESIS		22	-0.245855	-0.705295	0.753507	1	1	15489	tags=100%, list=75%, signal=407%
KEGG_JAK_STAT_SIGNALING_PATHWAY	KEGG_JAK_STAT_SIGNALING_PATHWAY		151	-0.237718	-0.690768	0.878906	1	1	3307	tags=21%, list=16%, signal=24%
KEGG_GLYOXYLATE_AND_DICARBOXYLATE_METABOLISM	KEGG_GLYOXYLATE_AND_DICARBOXYLATE_METABOLISM		16	-0.267421	-0.680187	0.798465	1	1	7583	tags=56%, list=37%, signal=89%
KEGG_GLUTATHIONE_METABOLISM	KEGG_GLUTATHIONE_METABOLISM		50	-0.218199	-0.678333	0.936293	1	1	5222	tags=32%, list=25%, signal=43%
KEGG_PATHWAYS_IN_CANCER	KEGG_PATHWAYS_IN_CANCER		321	-0.198637	-0.670095	0.864476	1	1	2737	tags=14%, list=13%, signal=16%
KEGG_DNA_REPLICATION	KEGG_DNA_REPLICATION		36	-0.252978	-0.666616	0.781053	1	1	7026	tags=53%, list=34%, signal=80%
KEGG_REGULATION_OF_ACTIN_CYTOSKELETON	KEGG_REGULATION_OF_ACTIN_CYTOSKELETON		208	-0.203887	-0.664799	0.900204	1	1	3228	tags=17%, list=16%, signal=20%
KEGG_HOMOLOGOUS_RECOMBINATION	KEGG_HOMOLOGOUS_RECOMBINATION		24	-0.240388	-0.642794	0.786008	1	1	5826	tags=46%, list=28%, signal=64%
KEGG_SNARE_INTERACTIONS_IN_VESICULAR_TRANSPORT	KEGG_SNARE_INTERACTIONS_IN_VESICULAR_TRANSPORT		38	-0.160769	-0.641741	0.865759	1	1	5188	tags=26%, list=25%, signal=35%
KEGG_RNA_DEGRADATION	KEGG_RNA_DEGRADATION		53	-0.152922	-0.631932	0.862275	1	1	925	tags=4%, list=5%, signal=4%
KEGG_GLYCOSAMINOGLYCAN_BIOSYNTHESIS_HEPARAN_SULFATE	KEGG_GLYCOSAMINOGLYCAN_BIOSYNTHESIS_HEPARAN_SULFATE		26	-0.239498	-0.631508	0.950593	1	1	4634	tags=31%, list=23%, signal=40%
KEGG_LEUKOCYTE_TRANSENDOTHELIAL_MIGRATION	KEGG_LEUKOCYTE_TRANSENDOTHELIAL_MIGRATION		114	-0.211737	-0.620142	0.920849	1	1	2771	tags=18%, list=13%, signal=20%
KEGG_CHEMOKINE_SIGNALING_PATHWAY	KEGG_CHEMOKINE_SIGNALING_PATHWAY		185	-0.229145	-0.608419	0.896825	1	1	2915	tags=21%, list=14%, signal=24%
KEGG_RENAL_CELL_CARCINOMA	KEGG_RENAL_CELL_CARCINOMA		66	-0.182126	-0.603785	0.836066	1	1	2868	tags=12%, list=14%, signal=14%
KEGG_CARDIAC_MUSCLE_CONTRACTION	KEGG_CARDIAC_MUSCLE_CONTRACTION		73	-0.215405	-0.602701	0.990215	1	1	4782	tags=30%, list=23%, signal=39%
KEGG_NUCLEOTIDE_EXCISION_REPAIR	KEGG_NUCLEOTIDE_EXCISION_REPAIR		44	-0.165818	-0.599925	0.878968	1	1	7136	tags=45%, list=35%, signal=70%
KEGG_OLFACTORY_TRANSDUCTION	KEGG_OLFACTORY_TRANSDUCTION		379	-0.170101	-0.594133	1	0.998957	1	3875	tags=12%, list=19%, signal=15%
KEGG_RETINOL_METABOLISM	KEGG_RETINOL_METABOLISM		62	-0.26591	-0.580922	0.980276	0.998813	1	3578	tags=31%, list=17%, signal=37%
KEGG_DRUG_METABOLISM_CYTOCHROME_P450	KEGG_DRUG_METABOLISM_CYTOCHROME_P450		71	-0.25128	-0.572986	0.988327	0.994544	1	3846	tags=30%, list=19%, signal=36%
KEGG_ASCORBATE_AND_ALDARATE_METABOLISM	KEGG_ASCORBATE_AND_ALDARATE_METABOLISM		24	-0.276893	-0.561758	0.960552	0.991413	1	3578	tags=29%, list=17%, signal=35%
KEGG_GLYCOSAMINOGLYCAN_BIOSYNTHESIS_CHONDROITIN_SULFATE	KEGG_GLYCOSAMINOGLYCAN_BIOSYNTHESIS_CHONDROITIN_SULFATE		22	-0.243309	-0.560601	0.913386	0.982735	1	4634	tags=27%, list=23%, signal=35%
KEGG_RNA_POLYMERASE	KEGG_RNA_POLYMERASE		28	-0.163926	-0.550705	0.947876	0.979391	1	6758	tags=39%, list=33%, signal=58%
KEGG_GLYCOSPHINGOLIPID_BIOSYNTHESIS_GANGLIO_SERIES	KEGG_GLYCOSPHINGOLIPID_BIOSYNTHESIS_GANGLIO_SERIES		15	-0.217448	-0.470199	0.985537	0.998336	1	2794	tags=20%, list=14%, signal=23%
KEGG_SPLICEOSOME	KEGG_SPLICEOSOME		110	-0.112024	-0.466012	0.986139	0.989682	1	8734	tags=45%, list=43%, signal=77%

## Sheet: Supplementary table 5
Supplementary table 5 gsea_report_for_Low_MECP2
NAME	GS<br> follow link to MSigDB	GS DETAILS	SIZE	ES	NES	NOM p-val	FDR q-val	FWER p-val	RANK AT MAX	LEADING EDGE
KEGG_DNA_REPLICATION	KEGG_DNA_REPLICATION	Details ...	36	-0.589315	-1.60671	0.0674603	0.119984	0.638	3758	tags=64%, list=18%, signal=78%
KEGG_CELL_CYCLE	KEGG_CELL_CYCLE		118	-0.275502	-1.18084	0.295802	0.521162	0.999	3608	tags=37%, list=18%, signal=45%
KEGG_MISMATCH_REPAIR	KEGG_MISMATCH_REPAIR		23	-0.362073	-1.0737	0.408818	0.643243	1	3758	tags=48%, list=18%, signal=58%
KEGG_P53_SIGNALING_PATHWAY	KEGG_P53_SIGNALING_PATHWAY		65	-0.258011	-1.04942	0.398453	0.670735	1	2943	tags=35%, list=14%, signal=41%
KEGG_AMINOACYL_TRNA_BIOSYNTHESIS	KEGG_AMINOACYL_TRNA_BIOSYNTHESIS	Details ...	22	-0.678969	-1.97035	0.00431035	0.06975	0.043	4916	tags=73%, list=24%, signal=96%
KEGG_PROTEASOME	KEGG_PROTEASOME	Details ...	43	-0.607563	-1.95636	0.00197239	0.039831	0.049	4247	tags=63%, list=21%, signal=79%
KEGG_TERPENOID_BACKBONE_BIOSYNTHESIS	KEGG_TERPENOID_BACKBONE_BIOSYNTHESIS	Details ...	15	-0.785569	-1.95341	0	0.0274023	0.051	2573	tags=73%, list=13%, signal=84%
KEGG_BASE_EXCISION_REPAIR	KEGG_BASE_EXCISION_REPAIR	Details ...	33	-0.536004	-1.7879	0.0197628	0.0871282	0.234	4408	tags=58%, list=21%, signal=73%
KEGG_OXIDATIVE_PHOSPHORYLATION	KEGG_OXIDATIVE_PHOSPHORYLATION	Details ...	101	-0.47647	-1.78323	0.0263158	0.0722813	0.241	3515	tags=63%, list=17%, signal=76%
KEGG_RNA_DEGRADATION	KEGG_RNA_DEGRADATION	Details ...	53	-0.415344	-1.74561	0.0400844	0.0846346	0.327	5183	tags=55%, list=25%, signal=73%
KEGG_CITRATE_CYCLE_TCA_CYCLE	KEGG_CITRATE_CYCLE_TCA_CYCLE	Details ...	30	-0.557242	-1.70545	0.0429448	0.0979014	0.407	4875	tags=70%, list=24%, signal=92%
KEGG_VALINE_LEUCINE_AND_ISOLEUCINE_DEGRADATION	KEGG_VALINE_LEUCINE_AND_ISOLEUCINE_DEGRADATION	Details ...	43	-0.488094	-1.66724	0.0353817	0.116964	0.495	3384	tags=67%, list=16%, signal=81%
KEGG_PROTEIN_EXPORT	KEGG_PROTEIN_EXPORT	Details ...	22	-0.524055	-1.63176	0.0323276	0.132126	0.572	5153	tags=73%, list=25%, signal=97%
KEGG_RNA_POLYMERASE	KEGG_RNA_POLYMERASE	Details ...	28	-0.500184	-1.62749	0.0530973	0.123257	0.586	4521	tags=43%, list=22%, signal=55%
KEGG_BUTANOATE_METABOLISM	KEGG_BUTANOATE_METABOLISM	Details ...	34	-0.575319	-1.60979	0.0196078	0.128504	0.631	2636	tags=50%, list=13%, signal=57%
KEGG_ONE_CARBON_POOL_BY_FOLATE	KEGG_ONE_CARBON_POOL_BY_FOLATE	Details ...	17	-0.575656	-1.60336	0.0371094	0.112979	0.641	3249	tags=59%, list=16%, signal=70%
KEGG_PYRIMIDINE_METABOLISM	KEGG_PYRIMIDINE_METABOLISM	Details ...	95	-0.350217	-1.58019	0.0440882	0.12225	0.693	3538	tags=40%, list=17%, signal=48%
KEGG_GLYOXYLATE_AND_DICARBOXYLATE_METABOLISM	KEGG_GLYOXYLATE_AND_DICARBOXYLATE_METABOLISM	Details ...	16	-0.607388	-1.57064	0.0476191	0.122141	0.713	4875	tags=69%, list=24%, signal=90%
KEGG_RIBOSOME	KEGG_RIBOSOME	Details ...	87	-0.555788	-1.5656	0.124464	0.11969	0.725	5505	tags=76%, list=27%, signal=103%
KEGG_PARKINSONS_DISEASE	KEGG_PARKINSONS_DISEASE	Details ...	99	-0.399015	-1.52188	0.0694445	0.152196	0.821	4165	tags=71%, list=20%, signal=88%
KEGG_HUNTINGTONS_DISEASE	KEGG_HUNTINGTONS_DISEASE	Details ...	160	-0.320633	-1.51093	0.0408602	0.154584	0.836	3873	tags=53%, list=19%, signal=65%
KEGG_PYRUVATE_METABOLISM	KEGG_PYRUVATE_METABOLISM	Details ...	39	-0.46601	-1.50319	0.0544355	0.153545	0.842	3048	tags=46%, list=15%, signal=54%
KEGG_NUCLEOTIDE_EXCISION_REPAIR	KEGG_NUCLEOTIDE_EXCISION_REPAIR	Details ...	44	-0.404126	-1.45105	0.131799	0.200868	0.911	5215	tags=57%, list=25%, signal=76%
KEGG_FRUCTOSE_AND_MANNOSE_METABOLISM	KEGG_FRUCTOSE_AND_MANNOSE_METABOLISM		32	-0.424323	-1.40735	0.1002	0.245058	0.938	4061	tags=56%, list=20%, signal=70%
KEGG_GLYCOSYLPHOSPHATIDYLINOSITOL_GPI_ANCHOR_BIOSYNTHESIS	KEGG_GLYCOSYLPHOSPHATIDYLINOSITOL_GPI_ANCHOR_BIOSYNTHESIS		25	-0.380419	-1.31639	0.186508	0.368807	0.976	5722	tags=64%, list=28%, signal=89%
KEGG_ASCORBATE_AND_ALDARATE_METABOLISM	KEGG_ASCORBATE_AND_ALDARATE_METABOLISM		24	-0.641939	-1.29109	0.1893	0.393971	0.986	3048	tags=58%, list=15%, signal=68%
KEGG_SPLICEOSOME	KEGG_SPLICEOSOME		110	-0.303101	-1.23012	0.241611	0.486577	0.994	4831	tags=37%, list=24%, signal=48%
KEGG_PORPHYRIN_AND_CHLOROPHYLL_METABOLISM	KEGG_PORPHYRIN_AND_CHLOROPHYLL_METABOLISM		39	-0.50532	-1.20647	0.251029	0.512642	0.999	3145	tags=49%, list=15%, signal=57%
KEGG_HOMOLOGOUS_RECOMBINATION	KEGG_HOMOLOGOUS_RECOMBINATION		24	-0.44356	-1.19653	0.322394	0.510747	0.999	4181	tags=50%, list=20%, signal=63%
KEGG_PROPANOATE_METABOLISM	KEGG_PROPANOATE_METABOLISM		31	-0.371983	-1.1698	0.288235	0.522166	0.999	3048	tags=52%, list=15%, signal=61%
KEGG_PENTOSE_AND_GLUCURONATE_INTERCONVERSIONS	KEGG_PENTOSE_AND_GLUCURONATE_INTERCONVERSIONS		26	-0.559408	-1.16173	0.279503	0.518857	0.999	2859	tags=46%, list=14%, signal=54%
KEGG_FATTY_ACID_METABOLISM	KEGG_FATTY_ACID_METABOLISM		40	-0.396474	-1.0859	0.372141	0.641086	1	3151	tags=48%, list=15%, signal=56%
KEGG_ALZHEIMERS_DISEASE	KEGG_ALZHEIMERS_DISEASE		144	-0.230383	-1.04077	0.403475	0.667328	1	2720	tags=39%, list=13%, signal=45%
KEGG_ARGININE_AND_PROLINE_METABOLISM	KEGG_ARGININE_AND_PROLINE_METABOLISM		51	-0.326517	-1.03873	0.39479	0.651412	1	3157	tags=43%, list=15%, signal=51%
KEGG_PEROXISOME	KEGG_PEROXISOME		77	-0.304696	-1.02459	0.418103	0.658466	1	3277	tags=32%, list=16%, signal=38%
KEGG_O_GLYCAN_BIOSYNTHESIS	KEGG_O_GLYCAN_BIOSYNTHESIS		26	-0.406103	-1.01838	0.446529	0.651489	1	1975	tags=35%, list=10%, signal=38%
KEGG_NITROGEN_METABOLISM	KEGG_NITROGEN_METABOLISM		23	-0.421577	-1.01659	0.443595	0.636874	1	1952	tags=35%, list=10%, signal=38%
KEGG_AMINO_SUGAR_AND_NUCLEOTIDE_SUGAR_METABOLISM	KEGG_AMINO_SUGAR_AND_NUCLEOTIDE_SUGAR_METABOLISM		42	-0.267619	-0.957142	0.505725	0.72563	1	3681	tags=48%, list=18%, signal=58%
KEGG_GLYCOLYSIS_GLUCONEOGENESIS	KEGG_GLYCOLYSIS_GLUCONEOGENESIS		61	-0.29852	-0.950387	0.50499	0.719421	1	3275	tags=43%, list=16%, signal=51%
KEGG_SELENOAMINO_ACID_METABOLISM	KEGG_SELENOAMINO_ACID_METABOLISM		24	-0.313308	-0.92436	0.55315	0.747272	1	1482	tags=17%, list=7%, signal=18%
KEGG_ALANINE_ASPARTATE_AND_GLUTAMATE_METABOLISM	KEGG_ALANINE_ASPARTATE_AND_GLUTAMATE_METABOLISM		30	-0.316304	-0.915976	0.580645	0.743711	1	2635	tags=33%, list=13%, signal=38%
KEGG_CYTOSOLIC_DNA_SENSING_PATHWAY	KEGG_CYTOSOLIC_DNA_SENSING_PATHWAY		54	-0.285889	-0.872272	0.594595	0.801795	1	1365	tags=13%, list=7%, signal=14%
KEGG_RETINOL_METABOLISM	KEGG_RETINOL_METABOLISM		62	-0.395298	-0.852826	0.685654	0.817195	1	1426	tags=31%, list=7%, signal=33%
KEGG_GLUTATHIONE_METABOLISM	KEGG_GLUTATHIONE_METABOLISM		50	-0.263723	-0.849057	0.65251	0.805345	1	2079	tags=28%, list=10%, signal=31%
KEGG_DRUG_METABOLISM_OTHER_ENZYMES	KEGG_DRUG_METABOLISM_OTHER_ENZYMES		49	-0.374426	-0.846501	0.668076	0.791777	1	1241	tags=29%, list=6%, signal=30%
KEGG_SPHINGOLIPID_METABOLISM	KEGG_SPHINGOLIPID_METABOLISM		36	-0.254593	-0.808418	0.715931	0.83848	1	2402	tags=19%, list=12%, signal=22%
KEGG_MATURITY_ONSET_DIABETES_OF_THE_YOUNG	KEGG_MATURITY_ONSET_DIABETES_OF_THE_YOUNG		25	-0.329493	-0.791336	0.786427	0.849848	1	2208	tags=28%, list=11%, signal=31%
KEGG_METABOLISM_OF_XENOBIOTICS_BY_CYTOCHROME_P450	KEGG_METABOLISM_OF_XENOBIOTICS_BY_CYTOCHROME_P450		69	-0.325671	-0.766495	0.763747	0.872585	1	1241	tags=26%, list=6%, signal=28%
KEGG_LINOLEIC_ACID_METABOLISM	KEGG_LINOLEIC_ACID_METABOLISM		28	-0.323173	-0.742228	0.853707	0.893625	1	811	tags=25%, list=4%, signal=26%
KEGG_LYSINE_DEGRADATION	KEGG_LYSINE_DEGRADATION		39	-0.189093	-0.718912	0.820041	0.911639	1	2573	tags=26%, list=13%, signal=29%
KEGG_ALPHA_LINOLENIC_ACID_METABOLISM	KEGG_ALPHA_LINOLENIC_ACID_METABOLISM		18	-0.290272	-0.693487	0.931774	0.929581	1	811	tags=22%, list=4%, signal=23%
KEGG_OTHER_GLYCAN_DEGRADATION	KEGG_OTHER_GLYCAN_DEGRADATION		16	-0.233548	-0.653833	0.881526	0.961392	1	15740	tags=100%, list=77%, signal=428%
KEGG_DRUG_METABOLISM_CYTOCHROME_P450	KEGG_DRUG_METABOLISM_CYTOCHROME_P450		71	-0.279193	-0.636312	0.938272	0.96339	1	1241	tags=27%, list=6%, signal=28%
KEGG_STARCH_AND_SUCROSE_METABOLISM	KEGG_STARCH_AND_SUCROSE_METABOLISM		49	-0.256891	-0.618212	0.954365	0.963713	1	1814	tags=24%, list=9%, signal=27%
KEGG_BIOSYNTHESIS_OF_UNSATURATED_FATTY_ACIDS	KEGG_BIOSYNTHESIS_OF_UNSATURATED_FATTY_ACIDS		20	-0.224953	-0.615948	0.936634	0.948233	1	4361	tags=35%, list=21%, signal=44%
KEGG_BLADDER_CANCER	KEGG_BLADDER_CANCER		40	-0.170316	-0.597647	0.957364	0.946889	1	2943	tags=25%, list=14%, signal=29%
KEGG_CYSTEINE_AND_METHIONINE_METABOLISM	KEGG_CYSTEINE_AND_METHIONINE_METABOLISM		34	-0.196522	-0.590704	0.966535	0.93582	1	2741	tags=26%, list=13%, signal=30%

## Sheet: Supplementary table 6
Supplementary table 6 gsea_report_for_High_MECP2
NAME	GS<br> follow link to MSigDB	GS DETAILS	SIZE	ES	NES	NOM p-val	FDR q-val	FWER p-val	RANK AT MAX	LEADING EDGE
KEGG_GLYCOSAMINOGLYCAN_BIOSYNTHESIS_HEPARAN_SULFATE	KEGG_GLYCOSAMINOGLYCAN_BIOSYNTHESIS_HEPARAN_SULFATE		26	0.532511	1.45503	0.0694143	0.312416	0.892	7292	tags=54%, list=36%, signal=83%
KEGG_REGULATION_OF_ACTIN_CYTOSKELETON	KEGG_REGULATION_OF_ACTIN_CYTOSKELETON		208	0.447467	1.46025	0.0570175	0.314907	0.883	6047	tags=38%, list=29%, signal=53%
KEGG_HEDGEHOG_SIGNALING_PATHWAY	KEGG_HEDGEHOG_SIGNALING_PATHWAY		56	0.558097	1.46543	0.0415842	0.318122	0.878	6193	tags=54%, list=30%, signal=77%
KEGG_EPITHELIAL_CELL_SIGNALING_IN_HELICOBACTER_PYLORI_INFECTION	KEGG_EPITHELIAL_CELL_SIGNALING_IN_HELICOBACTER_PYLORI_INFECTION		67	0.396147	1.44307	0.0966387	0.32183	0.909	4273	tags=18%, list=21%, signal=23%
KEGG_NEUROTROPHIN_SIGNALING_PATHWAY	KEGG_NEUROTROPHIN_SIGNALING_PATHWAY		125	0.381516	1.46738	0.0903226	0.327359	0.877	7341	tags=33%, list=36%, signal=51%
KEGG_INSULIN_SIGNALING_PATHWAY	KEGG_INSULIN_SIGNALING_PATHWAY		137	0.334671	1.39177	0.0824524	0.328322	0.948	7098	tags=30%, list=35%, signal=45%
KEGG_ADIPOCYTOKINE_SIGNALING_PATHWAY	KEGG_ADIPOCYTOKINE_SIGNALING_PATHWAY		67	0.450759	1.47256	0.0651731	0.330217	0.868	5224	tags=25%, list=25%, signal=34%
KEGG_LONG_TERM_POTENTIATION	KEGG_LONG_TERM_POTENTIATION		69	0.425053	1.36629	0.0869565	0.335156	0.961	7341	tags=41%, list=36%, signal=63%
KEGG_PHOSPHATIDYLINOSITOL_SIGNALING_SYSTEM	KEGG_PHOSPHATIDYLINOSITOL_SIGNALING_SYSTEM		76	0.373185	1.39182	0.0930736	0.337673	0.948	6722	tags=38%, list=33%, signal=57%
KEGG_CHRONIC_MYELOID_LEUKEMIA	KEGG_CHRONIC_MYELOID_LEUKEMIA		73	0.334726	1.40804	0.134328	0.339825	0.933	9043	tags=44%, list=44%, signal=78%
KEGG_VASCULAR_SMOOTH_MUSCLE_CONTRACTION	KEGG_VASCULAR_SMOOTH_MUSCLE_CONTRACTION		111	0.515502	1.47481	0.038055	0.340529	0.866	4475	tags=40%, list=22%, signal=50%
KEGG_MTOR_SIGNALING_PATHWAY	KEGG_MTOR_SIGNALING_PATHWAY		51	0.388398	1.4015	0.122845	0.34109	0.94	9084	tags=53%, list=44%, signal=95%
KEGG_ADHERENS_JUNCTION	KEGG_ADHERENS_JUNCTION		68	0.390302	1.42496	0.111349	0.342775	0.922	4656	tags=25%, list=23%, signal=32%
KEGG_GLIOMA	KEGG_GLIOMA		65	0.404433	1.36681	0.122056	0.343276	0.961	4912	tags=26%, list=24%, signal=34%
KEGG_NOTCH_SIGNALING_PATHWAY	KEGG_NOTCH_SIGNALING_PATHWAY		47	0.353479	1.35063	0.152688	0.343973	0.967	8955	tags=45%, list=44%, signal=79%
KEGG_LEUKOCYTE_TRANSENDOTHELIAL_MIGRATION	KEGG_LEUKOCYTE_TRANSENDOTHELIAL_MIGRATION		114	0.467565	1.34056	0.13969	0.344196	0.97	5946	tags=40%, list=29%, signal=56%
KEGG_ENDOMETRIAL_CANCER	KEGG_ENDOMETRIAL_CANCER		52	0.361644	1.39319	0.129512	0.345287	0.947	7588	tags=37%, list=37%, signal=58%
KEGG_PATHWAYS_IN_CANCER	KEGG_PATHWAYS_IN_CANCER		321	0.433908	1.4803	0.0672451	0.345406	0.861	5901	tags=34%, list=29%, signal=46%
KEGG_PROGESTERONE_MEDIATED_OOCYTE_MATURATION	KEGG_PROGESTERONE_MEDIATED_OOCYTE_MATURATION		85	0.385031	1.3703	0.115044	0.345979	0.961	2738	tags=15%, list=13%, signal=18%
KEGG_GNRH_SIGNALING_PATHWAY	KEGG_GNRH_SIGNALING_PATHWAY		100	0.401005	1.35464	0.0909091	0.346009	0.967	7096	tags=39%, list=35%, signal=59%
KEGG_GAP_JUNCTION	KEGG_GAP_JUNCTION		85	0.459336	1.41668	0.0784314	0.346482	0.927	6654	tags=45%, list=32%, signal=66%
KEGG_CARDIAC_MUSCLE_CONTRACTION	KEGG_CARDIAC_MUSCLE_CONTRACTION		73	0.500017	1.40913	0.0617284	0.348846	0.933	4043	tags=37%, list=20%, signal=46%
KEGG_ERBB_SIGNALING_PATHWAY	KEGG_ERBB_SIGNALING_PATHWAY		86	0.362841	1.34212	0.136268	0.349739	0.97	2778	tags=15%, list=14%, signal=17%
KEGG_ACUTE_MYELOID_LEUKEMIA	KEGG_ACUTE_MYELOID_LEUKEMIA		57	0.416347	1.37302	0.155361	0.350338	0.958	7697	tags=39%, list=37%, signal=62%
KEGG_BASAL_CELL_CARCINOMA	KEGG_BASAL_CELL_CARCINOMA	Details ...	55	0.560061	1.48245	0.0528455	0.359031	0.86	6193	tags=56%, list=30%, signal=80%
KEGG_BASAL_TRANSCRIPTION_FACTORS	KEGG_BASAL_TRANSCRIPTION_FACTORS		35	0.376933	1.323	0.148893	0.364436	0.972	3483	tags=17%, list=17%, signal=21%
KEGG_CELL_ADHESION_MOLECULES_CAMS	KEGG_CELL_ADHESION_MOLECULES_CAMS		128	0.562345	1.2995	0.17226	0.372128	0.981	6290	tags=53%, list=31%, signal=76%
KEGG_FC_GAMMA_R_MEDIATED_PHAGOCYTOSIS	KEGG_FC_GAMMA_R_MEDIATED_PHAGOCYTOSIS		92	0.440471	1.30846	0.232301	0.373652	0.981	6024	tags=36%, list=29%, signal=51%
KEGG_MAPK_SIGNALING_PATHWAY	KEGG_MAPK_SIGNALING_PATHWAY	Details ...	263	0.437127	1.48387	0.0385439	0.37497	0.858	4150	tags=27%, list=20%, signal=33%
KEGG_GLYCOSPHINGOLIPID_BIOSYNTHESIS_GANGLIO_SERIES	KEGG_GLYCOSPHINGOLIPID_BIOSYNTHESIS_GANGLIO_SERIES		15	0.596692	1.30218	0.159827	0.375401	0.981	2133	tags=27%, list=10%, signal=30%
KEGG_TYPE_II_DIABETES_MELLITUS	KEGG_TYPE_II_DIABETES_MELLITUS		46	0.471634	1.30927	0.140998	0.380632	0.981	6962	tags=43%, list=34%, signal=66%
KEGG_TGF_BETA_SIGNALING_PATHWAY	KEGG_TGF_BETA_SIGNALING_PATHWAY	Details ...	85	0.490657	1.48835	0.0570825	0.385086	0.848	5853	tags=38%, list=29%, signal=52%
KEGG_OOCYTE_MEIOSIS	KEGG_OOCYTE_MEIOSIS		110	0.313547	1.28543	0.120614	0.387554	0.982	7148	tags=29%, list=35%, signal=44%
KEGG_DORSO_VENTRAL_AXIS_FORMATION	KEGG_DORSO_VENTRAL_AXIS_FORMATION		24	0.430867	1.27425	0.155462	0.397539	0.982	8115	tags=46%, list=40%, signal=76%
KEGG_GLYCOSAMINOGLYCAN_BIOSYNTHESIS_CHONDROITIN_SULFATE	KEGG_GLYCOSAMINOGLYCAN_BIOSYNTHESIS_CHONDROITIN_SULFATE	Details ...	22	0.624271	1.50157	0.0395833	0.40099	0.835	4313	tags=55%, list=21%, signal=69%
KEGG_NEUROACTIVE_LIGAND_RECEPTOR_INTERACTION	KEGG_NEUROACTIVE_LIGAND_RECEPTOR_INTERACTION	Details ...	270	0.583381	1.48898	0.00426439	0.407063	0.848	4906	tags=56%, list=24%, signal=73%
KEGG_COLORECTAL_CANCER	KEGG_COLORECTAL_CANCER		62	0.346638	1.23805	0.223982	0.410714	0.989	6997	tags=32%, list=34%, signal=49%
KEGG_ABC_TRANSPORTERS	KEGG_ABC_TRANSPORTERS		44	0.45739	1.23877	0.169734	0.416698	0.989	4140	tags=32%, list=20%, signal=40%
KEGG_RENAL_CELL_CARCINOMA	KEGG_RENAL_CELL_CARCINOMA		66	0.364091	1.24236	0.291939	0.418366	0.989	7588	tags=36%, list=37%, signal=57%
KEGG_RENIN_ANGIOTENSIN_SYSTEM	KEGG_RENIN_ANGIOTENSIN_SYSTEM		17	0.573141	1.25626	0.191083	0.419497	0.986	6252	tags=59%, list=30%, signal=85%
KEGG_NICOTINATE_AND_NICOTINAMIDE_METABOLISM	KEGG_NICOTINATE_AND_NICOTINAMIDE_METABOLISM		22	0.465873	1.22693	0.188912	0.421137	0.99	6161	tags=41%, list=30%, signal=58%
KEGG_N_GLYCAN_BIOSYNTHESIS	KEGG_N_GLYCAN_BIOSYNTHESIS		46	0.294558	1.24414	0.211618	0.42334	0.989	3811	tags=13%, list=19%, signal=16%
KEGG_FOCAL_ADHESION	KEGG_FOCAL_ADHESION	Details ...	196	0.504882	1.50318	0.0826271	0.423651	0.832	5706	tags=42%, list=28%, signal=58%
KEGG_PROSTATE_CANCER	KEGG_PROSTATE_CANCER		89	0.333166	1.24773	0.218615	0.426258	0.988	4150	tags=19%, list=20%, signal=24%
KEGG_SNARE_INTERACTIONS_IN_VESICULAR_TRANSPORT	KEGG_SNARE_INTERACTIONS_IN_VESICULAR_TRANSPORT		38	0.30576	1.21529	0.251037	0.432189	0.994	6888	tags=29%, list=34%, signal=43%
KEGG_ECM_RECEPTOR_INTERACTION	KEGG_ECM_RECEPTOR_INTERACTION	Details ...	83	0.633751	1.53135	0.037037	0.439614	0.783	4671	tags=59%, list=23%, signal=76%
KEGG_PROXIMAL_TUBULE_BICARBONATE_RECLAMATION	KEGG_PROXIMAL_TUBULE_BICARBONATE_RECLAMATION		23	0.484825	1.20536	0.215264	0.440315	0.995	4015	tags=35%, list=20%, signal=43%
KEGG_AXON_GUIDANCE	KEGG_AXON_GUIDANCE	Details ...	127	0.514788	1.51782	0.0366379	0.442932	0.806	5267	tags=39%, list=26%, signal=53%
KEGG_ALDOSTERONE_REGULATED_SODIUM_REABSORPTION	KEGG_ALDOSTERONE_REGULATED_SODIUM_REABSORPTION		42	0.442011	1.19241	0.232967	0.446104	0.995	7004	tags=45%, list=34%, signal=69%
KEGG_NON_SMALL_CELL_LUNG_CANCER	KEGG_NON_SMALL_CELL_LUNG_CANCER		54	0.335451	1.19432	0.290254	0.450224	0.995	7588	tags=35%, list=37%, signal=56%
KEGG_MELANOGENESIS	KEGG_MELANOGENESIS	Details ...	101	0.497205	1.50353	0.0408998	0.453379	0.832	6654	tags=48%, list=32%, signal=70%
KEGG_ENDOCYTOSIS	KEGG_ENDOCYTOSIS	Details ...	175	0.360115	1.53559	0.0539957	0.467468	0.776	6047	tags=26%, list=29%, signal=36%
KEGG_WNT_SIGNALING_PATHWAY	KEGG_WNT_SIGNALING_PATHWAY	Details ...	149	0.458737	1.56283	0.0205339	0.471284	0.728	5220	tags=32%, list=25%, signal=42%
KEGG_PANCREATIC_CANCER	KEGG_PANCREATIC_CANCER		69	0.323524	1.16616	0.315904	0.48123	0.997	2605	tags=13%, list=13%, signal=15%
KEGG_TYROSINE_METABOLISM	KEGG_TYROSINE_METABOLISM		40	0.43988	1.16103	0.241379	0.481817	0.997	3415	tags=30%, list=17%, signal=36%
KEGG_LONG_TERM_DEPRESSION	KEGG_LONG_TERM_DEPRESSION	Details ...	66	0.540022	1.54348	0.0150538	0.485795	0.765	2507	tags=29%, list=12%, signal=33%
KEGG_THYROID_CANCER	KEGG_THYROID_CANCER	Details ...	29	0.4465	1.57463	0.0440882	0.48813	0.706	2939	tags=17%, list=14%, signal=20%
KEGG_TASTE_TRANSDUCTION	KEGG_TASTE_TRANSDUCTION		50	0.444935	1.1386	0.253731	0.504605	0.997	7004	tags=48%, list=34%, signal=73%
KEGG_CHEMOKINE_SIGNALING_PATHWAY	KEGG_CHEMOKINE_SIGNALING_PATHWAY		185	0.437471	1.1402	0.326577	0.509361	0.997	6164	tags=41%, list=30%, signal=57%
KEGG_PHENYLALANINE_METABOLISM	KEGG_PHENYLALANINE_METABOLISM		17	0.473914	1.12698	0.293388	0.509468	0.997	3985	tags=35%, list=19%, signal=44%
KEGG_JAK_STAT_SIGNALING_PATHWAY	KEGG_JAK_STAT_SIGNALING_PATHWAY		151	0.3835	1.11942	0.33125	0.513839	0.997	7960	tags=45%, list=39%, signal=73%
KEGG_VIRAL_MYOCARDITIS	KEGG_VIRAL_MYOCARDITIS		68	0.449158	1.11434	0.372845	0.514946	0.997	6139	tags=38%, list=30%, signal=54%
KEGG_B_CELL_RECEPTOR_SIGNALING_PATHWAY	KEGG_B_CELL_RECEPTOR_SIGNALING_PATHWAY		74	0.405607	1.12718	0.364238	0.516741	0.997	7633	tags=46%, list=37%, signal=73%
KEGG_GLYCEROPHOSPHOLIPID_METABOLISM	KEGG_GLYCEROPHOSPHOLIPID_METABOLISM		70	0.301749	1.09986	0.305556	0.53135	0.998	2987	tags=13%, list=15%, signal=15%
KEGG_DILATED_CARDIOMYOPATHY	KEGG_DILATED_CARDIOMYOPATHY	Details ...	90	0.613196	1.58028	0.00437637	0.537014	0.69	6097	tags=59%, list=30%, signal=83%
KEGG_T_CELL_RECEPTOR_SIGNALING_PATHWAY	KEGG_T_CELL_RECEPTOR_SIGNALING_PATHWAY		106	0.394499	1.0825	0.410148	0.545028	0.998	7600	tags=42%, list=37%, signal=66%
KEGG_SMALL_CELL_LUNG_CANCER	KEGG_SMALL_CELL_LUNG_CANCER		84	0.300164	1.08263	0.394628	0.552448	0.998	5865	tags=24%, list=29%, signal=33%
KEGG_CALCIUM_SIGNALING_PATHWAY	KEGG_CALCIUM_SIGNALING_PATHWAY	Details ...	176	0.596165	1.59782	0	0.553497	0.65	4823	tags=52%, list=23%, signal=68%
KEGG_BETA_ALANINE_METABOLISM	KEGG_BETA_ALANINE_METABOLISM		22	0.401458	1.0721	0.363821	0.554929	0.999	2944	tags=18%, list=14%, signal=21%
KEGG_VASOPRESSIN_REGULATED_WATER_REABSORPTION	KEGG_VASOPRESSIN_REGULATED_WATER_REABSORPTION		44	0.306687	1.0551	0.373494	0.576337	0.999	3432	tags=11%, list=17%, signal=14%
KEGG_PPAR_SIGNALING_PATHWAY	KEGG_PPAR_SIGNALING_PATHWAY		69	0.379038	1.04125	0.39313	0.590923	0.999	3094	tags=19%, list=15%, signal=22%
KEGG_GLYCEROLIPID_METABOLISM	KEGG_GLYCEROLIPID_METABOLISM		43	0.313036	1.03363	0.392578	0.59558	1	4460	tags=19%, list=22%, signal=24%
KEGG_CYTOKINE_CYTOKINE_RECEPTOR_INTERACTION	KEGG_CYTOKINE_CYTOKINE_RECEPTOR_INTERACTION		258	0.410545	1.01055	0.454545	0.59731	1	5783	tags=41%, list=28%, signal=56%
KEGG_PRIMARY_BILE_ACID_BIOSYNTHESIS	KEGG_PRIMARY_BILE_ACID_BIOSYNTHESIS		16	0.476299	1.006	0.465483	0.597464	1	2753	tags=25%, list=13%, signal=29%
KEGG_VEGF_SIGNALING_PATHWAY	KEGG_VEGF_SIGNALING_PATHWAY		74	0.318292	0.997481	0.475687	0.597733	1	7130	tags=35%, list=35%, signal=54%
KEGG_UBIQUITIN_MEDIATED_PROTEOLYSIS	KEGG_UBIQUITIN_MEDIATED_PROTEOLYSIS		130	0.155019	0.999226	0.423828	0.601728	1	8798	tags=27%, list=43%, signal=47%
KEGG_HISTIDINE_METABOLISM	KEGG_HISTIDINE_METABOLISM		27	0.383612	1.01121	0.464503	0.603395	1	3759	tags=22%, list=18%, signal=27%
KEGG_AMYOTROPHIC_LATERAL_SCLEROSIS_ALS	KEGG_AMYOTROPHIC_LATERAL_SCLEROSIS_ALS	Details ...	52	0.523826	1.61261	0.0379747	0.605414	0.61	1924	tags=21%, list=9%, signal=23%
KEGG_TOLL_LIKE_RECEPTOR_SIGNALING_PATHWAY	KEGG_TOLL_LIKE_RECEPTOR_SIGNALING_PATHWAY		101	0.367298	1.02273	0.455696	0.607154	1	7251	tags=32%, list=35%, signal=49%
KEGG_COMPLEMENT_AND_COAGULATION_CASCADES	KEGG_COMPLEMENT_AND_COAGULATION_CASCADES		68	0.452114	0.987079	0.509018	0.60736	1	4623	tags=40%, list=23%, signal=51%
KEGG_INOSITOL_PHOSPHATE_METABOLISM	KEGG_INOSITOL_PHOSPHATE_METABOLISM		54	0.274415	1.01232	0.438597	0.609305	1	6722	tags=33%, list=33%, signal=49%
KEGG_SYSTEMIC_LUPUS_ERYTHEMATOSUS	KEGG_SYSTEMIC_LUPUS_ERYTHEMATOSUS		54	0.492479	1.01686	0.49569	0.609699	1	7064	tags=56%, list=34%, signal=84%
KEGG_VIBRIO_CHOLERAE_INFECTION	KEGG_VIBRIO_CHOLERAE_INFECTION		53	0.245124	0.966451	0.503185	0.632953	1	2778	tags=9%, list=14%, signal=11%
KEGG_NOD_LIKE_RECEPTOR_SIGNALING_PATHWAY	KEGG_NOD_LIKE_RECEPTOR_SIGNALING_PATHWAY		60	0.366039	0.958813	0.532468	0.63897	1	5701	tags=35%, list=28%, signal=48%
KEGG_ASTHMA	KEGG_ASTHMA		28	0.484657	0.95332	0.528384	0.640943	1	9461	tags=82%, list=46%, signal=152%
KEGG_PRION_DISEASES	KEGG_PRION_DISEASES		35	0.387414	0.948411	0.545455	0.642278	1	7064	tags=46%, list=34%, signal=70%
KEGG_LYSOSOME	KEGG_LYSOSOME		119	0.221076	0.939013	0.515151	0.650919	1	10420	tags=45%, list=51%, signal=90%
KEGG_FC_EPSILON_RI_SIGNALING_PATHWAY	KEGG_FC_EPSILON_RI_SIGNALING_PATHWAY		78	0.316948	0.926829	0.538793	0.664164	1	8156	tags=45%, list=40%, signal=74%
KEGG_HEMATOPOIETIC_CELL_LINEAGE	KEGG_HEMATOPOIETIC_CELL_LINEAGE		84	0.434156	0.921156	0.597315	0.666321	1	5416	tags=43%, list=26%, signal=58%
KEGG_HYPERTROPHIC_CARDIOMYOPATHY_HCM	KEGG_HYPERTROPHIC_CARDIOMYOPATHY_HCM	Details ...	83	0.63109	1.6281	0.00218341	0.685029	0.584	4230	tags=47%, list=21%, signal=59%
KEGG_PATHOGENIC_ESCHERICHIA_COLI_INFECTION	KEGG_PATHOGENIC_ESCHERICHIA_COLI_INFECTION		53	0.244194	0.89742	0.603734	0.692258	1	8673	tags=38%, list=42%, signal=65%
KEGG_AUTOIMMUNE_THYROID_DISEASE	KEGG_AUTOIMMUNE_THYROID_DISEASE		50	0.39596	0.900798	0.54717	0.693947	1	9310	tags=56%, list=45%, signal=102%
KEGG_GLYCINE_SERINE_AND_THREONINE_METABOLISM	KEGG_GLYCINE_SERINE_AND_THREONINE_METABOLISM		31	0.369048	0.888566	0.62249	0.698041	1	3048	tags=23%, list=15%, signal=26%
KEGG_LEISHMANIA_INFECTION	KEGG_LEISHMANIA_INFECTION		70	0.397506	0.877425	0.627803	0.709035	1	6285	tags=39%, list=31%, signal=55%
KEGG_PRIMARY_IMMUNODEFICIENCY	KEGG_PRIMARY_IMMUNODEFICIENCY		35	0.422285	0.868933	0.655098	0.715609	1	8154	tags=57%, list=40%, signal=95%
KEGG_TRYPTOPHAN_METABOLISM	KEGG_TRYPTOPHAN_METABOLISM		38	0.320532	0.852435	0.658228	0.735246	1	3169	tags=16%, list=15%, signal=19%
KEGG_ARACHIDONIC_ACID_METABOLISM	KEGG_ARACHIDONIC_ACID_METABOLISM		57	0.321415	0.845787	0.714868	0.738527	1	5403	tags=32%, list=26%, signal=43%
KEGG_PURINE_METABOLISM	KEGG_PURINE_METABOLISM		148	0.211089	0.840605	0.722707	0.739931	1	6912	tags=26%, list=34%, signal=38%
KEGG_NATURAL_KILLER_CELL_MEDIATED_CYTOTOXICITY	KEGG_NATURAL_KILLER_CELL_MEDIATED_CYTOTOXICITY		131	0.305599	0.807701	0.660256	0.787502	1	8156	tags=42%, list=40%, signal=69%
KEGG_ALLOGRAFT_REJECTION	KEGG_ALLOGRAFT_REJECTION		35	0.405648	0.801744	0.680672	0.789508	1	9461	tags=66%, list=46%, signal=122%
KEGG_PANTOTHENATE_AND_COA_BIOSYNTHESIS	KEGG_PANTOTHENATE_AND_COA_BIOSYNTHESIS		16	0.322028	0.759271	0.753564	0.84343	1	2511	tags=19%, list=12%, signal=21%
KEGG_APOPTOSIS	KEGG_APOPTOSIS		86	0.21689	0.759356	0.699346	0.85145	1	7357	tags=27%, list=36%, signal=42%
KEGG_TYPE_I_DIABETES_MELLITUS	KEGG_TYPE_I_DIABETES_MELLITUS		41	0.343123	0.728773	0.747881	0.866115	1	9069	tags=54%, list=44%, signal=96%
KEGG_GLYCOSPHINGOLIPID_BIOSYNTHESIS_LACTO_AND_NEOLACTO_SERIES	KEGG_GLYCOSPHINGOLIPID_BIOSYNTHESIS_LACTO_AND_NEOLACTO_SERIES		25	0.289334	0.739185	0.870614	0.86619	1	2824	tags=16%, list=14%, signal=19%
KEGG_ETHER_LIPID_METABOLISM	KEGG_ETHER_LIPID_METABOLISM		29	0.266942	0.731011	0.871102	0.870827	1	4146	tags=21%, list=20%, signal=26%
KEGG_PENTOSE_PHOSPHATE_PATHWAY	KEGG_PENTOSE_PHOSPHATE_PATHWAY		26	0.229352	0.716404	0.782	0.876552	1	5947	tags=23%, list=29%, signal=32%
KEGG_MELANOMA	KEGG_MELANOMA	Details ...	71	0.581369	1.62845	0.00849257	0.912316	0.584	4099	tags=38%, list=20%, signal=47%
KEGG_RIG_I_LIKE_RECEPTOR_SIGNALING_PATHWAY	KEGG_RIG_I_LIKE_RECEPTOR_SIGNALING_PATHWAY		68	0.187556	0.650608	0.943662	0.92957	1	12070	tags=56%, list=59%, signal=135%
KEGG_OLFACTORY_TRANSDUCTION	KEGG_OLFACTORY_TRANSDUCTION		379	0.19369	0.670555	1	0.930311	1	9802	tags=33%, list=48%, signal=61%
KEGG_GLYCOSAMINOGLYCAN_DEGRADATION	KEGG_GLYCOSAMINOGLYCAN_DEGRADATION		21	0.251783	0.655606	0.867841	0.932277	1	5055	tags=24%, list=25%, signal=32%
KEGG_GALACTOSE_METABOLISM	KEGG_GALACTOSE_METABOLISM		26	0.219718	0.658437	0.910256	0.937384	1	6934	tags=27%, list=34%, signal=41%
KEGG_ANTIGEN_PROCESSING_AND_PRESENTATION	KEGG_ANTIGEN_PROCESSING_AND_PRESENTATION		80	0.210097	0.532375	0.941053	0.978457	1	10234	tags=41%, list=50%, signal=82%
KEGG_INTESTINAL_IMMUNE_NETWORK_FOR_IGA_PRODUCTION	KEGG_INTESTINAL_IMMUNE_NETWORK_FOR_IGA_PRODUCTION		46	0.264094	0.536689	0.915929	0.985051	1	8735	tags=63%, list=43%, signal=109%
KEGG_STEROID_BIOSYNTHESIS	KEGG_STEROID_BIOSYNTHESIS		15	0.215947	0.547145	0.948515	0.988698	1	3519	tags=13%, list=17%, signal=16%
KEGG_REGULATION_OF_AUTOPHAGY	KEGG_REGULATION_OF_AUTOPHAGY		34	0.177373	0.563237	0.976238	0.988755	1	5699	tags=15%, list=28%, signal=20%
KEGG_STEROID_HORMONE_BIOSYNTHESIS	KEGG_STEROID_HORMONE_BIOSYNTHESIS		54	0.247844	0.574916	0.996139	0.989603	1	3767	tags=19%, list=18%, signal=23%
KEGG_GRAFT_VERSUS_HOST_DISEASE	KEGG_GRAFT_VERSUS_HOST_DISEASE		37	0.246425	0.46861	0.971302	0.990104	1	9069	tags=51%, list=44%, signal=92%
KEGG_ARRHYTHMOGENIC_RIGHT_VENTRICULAR_CARDIOMYOPATHY_ARVC	KEGG_ARRHYTHMOGENIC_RIGHT_VENTRICULAR_CARDIOMYOPATHY_ARVC	Details ...	74	0.629964	1.64747	0	1	0.548	4230	tags=49%, list=21%, signal=61%
KEGG_TIGHT_JUNCTION	KEGG_TIGHT_JUNCTION	Details ...	128	0.470399	1.64168	0.00601202	1	0.559	3591	tags=24%, list=17%, signal=29%

## Sheet: Supplementary table 7
Supplementary table 7 gsea_report_for_High_VEGFA
NAME	GS<br> follow link to MSigDB	GS DETAILS	SIZE	ES	NES	NOM p-val	FDR q-val	FWER p-val	RANK AT MAX	LEADING EDGE
KEGG_MISMATCH_REPAIR	KEGG_MISMATCH_REPAIR	Details ...	23	0.427998	1.26534	0.221294	1	0.991	6891	tags=43%, list=34%, signal=65%
KEGG_CELL_CYCLE	KEGG_CELL_CYCLE		118	0.142092	0.618964	0.840816	1	1	8163	tags=50%, list=40%, signal=83%
KEGG_HOMOLOGOUS_RECOMBINATION	KEGG_HOMOLOGOUS_RECOMBINATION	Details ...	24	0.533795	1.43148	0.142268	1	0.934	3606	tags=33%, list=18%, signal=40%
KEGG_STEROID_BIOSYNTHESIS	KEGG_STEROID_BIOSYNTHESIS	Details ...	15	0.555996	1.39378	0.126459	1	0.955	5583	tags=60%, list=27%, signal=82%
KEGG_GLYCOSYLPHOSPHATIDYLINOSITOL_GPI_ANCHOR_BIOSYNTHESIS	KEGG_GLYCOSYLPHOSPHATIDYLINOSITOL_GPI_ANCHOR_BIOSYNTHESIS	Details ...	25	0.361576	1.25166	0.204771	1	0.993	3295	tags=20%, list=16%, signal=24%
KEGG_SPLICEOSOME	KEGG_SPLICEOSOME	Details ...	110	0.30677	1.23089	0.246407	1	0.995	7585	tags=40%, list=37%, signal=63%
KEGG_TASTE_TRANSDUCTION	KEGG_TASTE_TRANSDUCTION	Details ...	50	0.482308	1.22825	0.173387	0.889904	0.996	3458	tags=36%, list=17%, signal=43%
KEGG_RNA_DEGRADATION	KEGG_RNA_DEGRADATION	Details ...	53	0.287016	1.17034	0.287149	0.941249	0.997	8067	tags=43%, list=39%, signal=71%
KEGG_DNA_REPLICATION	KEGG_DNA_REPLICATION	Details ...	36	0.366578	1.00122	0.470825	1	1	8036	tags=47%, list=39%, signal=77%
KEGG_NUCLEOTIDE_EXCISION_REPAIR	KEGG_NUCLEOTIDE_EXCISION_REPAIR	Details ...	44	0.274579	0.979758	0.459677	1	1	5138	tags=18%, list=25%, signal=24%
KEGG_LYSINE_DEGRADATION	KEGG_LYSINE_DEGRADATION	Details ...	39	0.255504	0.951335	0.491525	1	1	7245	tags=46%, list=35%, signal=71%
KEGG_SNARE_INTERACTIONS_IN_VESICULAR_TRANSPORT	KEGG_SNARE_INTERACTIONS_IN_VESICULAR_TRANSPORT	Details ...	38	0.224881	0.916142	0.530815	1	1	2048	tags=13%, list=10%, signal=15%
KEGG_NICOTINATE_AND_NICOTINAMIDE_METABOLISM	KEGG_NICOTINATE_AND_NICOTINAMIDE_METABOLISM	Details ...	22	0.348141	0.913351	0.604743	1	1	1411	tags=18%, list=7%, signal=20%
KEGG_OLFACTORY_TRANSDUCTION	KEGG_OLFACTORY_TRANSDUCTION	Details ...	379	0.250776	0.865158	0.818356	1	1	3869	tags=18%, list=19%, signal=21%
KEGG_GLYOXYLATE_AND_DICARBOXYLATE_METABOLISM	KEGG_GLYOXYLATE_AND_DICARBOXYLATE_METABOLISM	Details ...	16	0.339051	0.851926	0.632812	1	1	5556	tags=38%, list=27%, signal=51%
KEGG_OTHER_GLYCAN_DEGRADATION	KEGG_OTHER_GLYCAN_DEGRADATION	Details ...	16	0.295811	0.83906	0.646245	1	1	2657	tags=19%, list=13%, signal=22%
KEGG_BASAL_TRANSCRIPTION_FACTORS	KEGG_BASAL_TRANSCRIPTION_FACTORS	Details ...	35	0.229141	0.826589	0.681913	1	1	5095	tags=31%, list=25%, signal=42%
KEGG_PROTEIN_EXPORT	KEGG_PROTEIN_EXPORT	Details ...	22	0.236201	0.737363	0.799603	1	1	15685	tags=100%, list=76%, signal=423%
KEGG_PPAR_SIGNALING_PATHWAY	KEGG_PPAR_SIGNALING_PATHWAY	Details ...	69	0.244942	0.685386	0.944664	1	1	2767	tags=20%, list=13%, signal=23%
KEGG_OOCYTE_MEIOSIS	KEGG_OOCYTE_MEIOSIS	Details ...	110	0.165122	0.672482	0.9501	1	1	4725	tags=17%, list=23%, signal=22%
KEGG_GLYCINE_SERINE_AND_THREONINE_METABOLISM	KEGG_GLYCINE_SERINE_AND_THREONINE_METABOLISM	Details ...	31	0.271604	0.669369	0.946215	1	1	4326	tags=39%, list=21%, signal=49%
KEGG_AMINOACYL_TRNA_BIOSYNTHESIS	KEGG_AMINOACYL_TRNA_BIOSYNTHESIS		22	0.217184	0.626299	0.851562	1	1	16075	tags=100%, list=78%, signal=460%
KEGG_PYRUVATE_METABOLISM	KEGG_PYRUVATE_METABOLISM		39	0.191497	0.617187	0.953216	1	1	4093	tags=23%, list=20%, signal=29%
KEGG_DORSO_VENTRAL_AXIS_FORMATION	KEGG_DORSO_VENTRAL_AXIS_FORMATION		24	0.197773	0.586514	0.958592	1	1	4481	tags=25%, list=22%, signal=32%
KEGG_RNA_POLYMERASE	KEGG_RNA_POLYMERASE		28	0.173436	0.57375	0.911647	0.987294	1	6596	tags=32%, list=32%, signal=47%
KEGG_BASE_EXCISION_REPAIR	KEGG_BASE_EXCISION_REPAIR		33	0.14465	0.476204	0.973085	0.988649	1	6647	tags=30%, list=32%, signal=45%

## Sheet: Supplementary table 8
Supplementary table 8 gsea_report_for_High_VEGFA
NAME	GS<br> follow link to MSigDB	GS DETAILS	SIZE	ES	NES	NOM p-val	FDR q-val	FWER p-val	RANK AT MAX	LEADING EDGE
KEGG_LYSOSOME	KEGG_LYSOSOME	Details ...	119	-0.429246	-1.82478	0.0217822	0.667816	0.201	5729	tags=42%, list=28%, signal=58%
KEGG_AMINO_SUGAR_AND_NUCLEOTIDE_SUGAR_METABOLISM	KEGG_AMINO_SUGAR_AND_NUCLEOTIDE_SUGAR_METABOLISM	Details ...	42	-0.500866	-1.7778	0.01341	0.508663	0.267	6178	tags=57%, list=30%, signal=82%
KEGG_VALINE_LEUCINE_AND_ISOLEUCINE_DEGRADATION	KEGG_VALINE_LEUCINE_AND_ISOLEUCINE_DEGRADATION	Details ...	43	-0.520369	-1.76196	0.0198413	0.381857	0.29	6696	tags=67%, list=33%, signal=100%
KEGG_PARKINSONS_DISEASE	KEGG_PARKINSONS_DISEASE	Details ...	99	-0.444027	-1.73709	0.0298805	0.343122	0.334	8305	tags=62%, list=40%, signal=103%
KEGG_SPHINGOLIPID_METABOLISM	KEGG_SPHINGOLIPID_METABOLISM	Details ...	36	-0.501368	-1.57875	0.0311891	0.913097	0.718	4822	tags=47%, list=23%, signal=62%
KEGG_O_GLYCAN_BIOSYNTHESIS	KEGG_O_GLYCAN_BIOSYNTHESIS	Details ...	26	-0.630081	-1.55035	0.0375783	0.917015	0.762	1927	tags=27%, list=9%, signal=30%
KEGG_APOPTOSIS	KEGG_APOPTOSIS	Details ...	86	-0.445527	-1.51887	0.0669291	0.958912	0.82	5360	tags=38%, list=26%, signal=52%
KEGG_OXIDATIVE_PHOSPHORYLATION	KEGG_OXIDATIVE_PHOSPHORYLATION	Details ...	101	-0.396007	-1.51438	0.0954357	0.864047	0.828	7739	tags=52%, list=38%, signal=84%
KEGG_NATURAL_KILLER_CELL_MEDIATED_CYTOTOXICITY	KEGG_NATURAL_KILLER_CELL_MEDIATED_CYTOTOXICITY	Details ...	131	-0.573334	-1.4974	0.046371	0.868777	0.858	3011	tags=37%, list=15%, signal=44%
KEGG_HEMATOPOIETIC_CELL_LINEAGE	KEGG_HEMATOPOIETIC_CELL_LINEAGE	Details ...	84	-0.700565	-1.49644	0.0256917	0.78738	0.86	3393	tags=61%, list=17%, signal=72%
KEGG_ETHER_LIPID_METABOLISM	KEGG_ETHER_LIPID_METABOLISM	Details ...	29	-0.546704	-1.46218	0.0385356	0.882216	0.894	4424	tags=55%, list=22%, signal=70%
KEGG_ALDOSTERONE_REGULATED_SODIUM_REABSORPTION	KEGG_ALDOSTERONE_REGULATED_SODIUM_REABSORPTION	Details ...	42	-0.534054	-1.45957	0.0451977	0.818522	0.901	4510	tags=45%, list=22%, signal=58%
KEGG_GLYCOSAMINOGLYCAN_DEGRADATION	KEGG_GLYCOSAMINOGLYCAN_DEGRADATION	Details ...	21	-0.549088	-1.44922	0.0882353	0.807952	0.913	3106	tags=33%, list=15%, signal=39%
KEGG_FC_EPSILON_RI_SIGNALING_PATHWAY	KEGG_FC_EPSILON_RI_SIGNALING_PATHWAY	Details ...	78	-0.493161	-1.44657	0.0807087	0.762133	0.914	3693	tags=33%, list=18%, signal=40%
KEGG_FC_GAMMA_R_MEDIATED_PHAGOCYTOSIS	KEGG_FC_GAMMA_R_MEDIATED_PHAGOCYTOSIS	Details ...	92	-0.481376	-1.44316	0.111538	0.728489	0.917	3090	tags=28%, list=15%, signal=33%
KEGG_ANTIGEN_PROCESSING_AND_PRESENTATION	KEGG_ANTIGEN_PROCESSING_AND_PRESENTATION	Details ...	80	-0.574791	-1.43364	0.0978044	0.722899	0.925	5516	tags=63%, list=27%, signal=85%
KEGG_ARGININE_AND_PROLINE_METABOLISM	KEGG_ARGININE_AND_PROLINE_METABOLISM	Details ...	51	-0.442966	-1.42989	0.0694981	0.69463	0.93	8226	tags=67%, list=40%, signal=111%
KEGG_PROSTATE_CANCER	KEGG_PROSTATE_CANCER	Details ...	89	-0.39246	-1.42576	0.0838323	0.669653	0.93	3581	tags=19%, list=17%, signal=23%
KEGG_AUTOIMMUNE_THYROID_DISEASE	KEGG_AUTOIMMUNE_THYROID_DISEASE	Details ...	50	-0.64327	-1.42407	0.0714286	0.640282	0.93	3117	tags=52%, list=15%, signal=61%
KEGG_INTESTINAL_IMMUNE_NETWORK_FOR_IGA_PRODUCTION	KEGG_INTESTINAL_IMMUNE_NETWORK_FOR_IGA_PRODUCTION	Details ...	46	-0.702448	-1.40335	0.0934394	0.681623	0.947	2793	tags=63%, list=14%, signal=73%
KEGG_GRAFT_VERSUS_HOST_DISEASE	KEGG_GRAFT_VERSUS_HOST_DISEASE		37	-0.737227	-1.39241	0.0964567	0.68787	0.953	2793	tags=65%, list=14%, signal=75%
KEGG_CELL_ADHESION_MOLECULES_CAMS	KEGG_CELL_ADHESION_MOLECULES_CAMS		128	-0.582827	-1.38028	0.127413	0.699498	0.96	3392	tags=50%, list=17%, signal=60%
KEGG_TOLL_LIKE_RECEPTOR_SIGNALING_PATHWAY	KEGG_TOLL_LIKE_RECEPTOR_SIGNALING_PATHWAY		101	-0.498535	-1.3686	0.1611	0.711093	0.967	2953	tags=26%, list=14%, signal=30%
KEGG_GLYCOSPHINGOLIPID_BIOSYNTHESIS_GANGLIO_SERIES	KEGG_GLYCOSPHINGOLIPID_BIOSYNTHESIS_GANGLIO_SERIES		15	-0.630897	-1.36827	0.105477	0.682211	0.968	5266	tags=60%, list=26%, signal=81%
KEGG_ALLOGRAFT_REJECTION	KEGG_ALLOGRAFT_REJECTION		35	-0.715003	-1.36219	0.130261	0.67457	0.969	2793	tags=63%, list=14%, signal=73%
KEGG_TYPE_I_DIABETES_MELLITUS	KEGG_TYPE_I_DIABETES_MELLITUS		41	-0.654557	-1.36212	0.114625	0.649	0.969	3972	tags=61%, list=19%, signal=75%
KEGG_CYTOKINE_CYTOKINE_RECEPTOR_INTERACTION	KEGG_CYTOKINE_CYTOKINE_RECEPTOR_INTERACTION		258	-0.554358	-1.36123	0.11022	0.627582	0.969	3001	tags=43%, list=15%, signal=49%
KEGG_NON_SMALL_CELL_LUNG_CANCER	KEGG_NON_SMALL_CELL_LUNG_CANCER		54	-0.385827	-1.35864	0.122047	0.613553	0.969	3595	tags=22%, list=18%, signal=27%
KEGG_SYSTEMIC_LUPUS_ERYTHEMATOSUS	KEGG_SYSTEMIC_LUPUS_ERYTHEMATOSUS		54	-0.675088	-1.35293	0.134	0.607016	0.972	2793	tags=59%, list=14%, signal=68%
KEGG_VIBRIO_CHOLERAE_INFECTION	KEGG_VIBRIO_CHOLERAE_INFECTION		53	-0.337754	-1.34097	0.101562	0.625205	0.977	2188	tags=13%, list=11%, signal=15%
KEGG_LEISHMANIA_INFECTION	KEGG_LEISHMANIA_INFECTION		70	-0.608801	-1.33287	0.20198	0.629869	0.978	2953	tags=44%, list=14%, signal=52%
KEGG_VIRAL_MYOCARDITIS	KEGG_VIRAL_MYOCARDITIS		68	-0.542767	-1.32464	0.168605	0.63431	0.98	3583	tags=46%, list=17%, signal=55%
KEGG_ASTHMA	KEGG_ASTHMA		28	-0.675667	-1.32453	0.17495	0.615403	0.98	3045	tags=64%, list=15%, signal=75%
KEGG_NITROGEN_METABOLISM	KEGG_NITROGEN_METABOLISM		23	-0.551156	-1.31741	0.114458	0.61424	0.981	3707	tags=52%, list=18%, signal=64%
KEGG_ALANINE_ASPARTATE_AND_GLUTAMATE_METABOLISM	KEGG_ALANINE_ASPARTATE_AND_GLUTAMATE_METABOLISM		30	-0.445045	-1.31132	0.104536	0.613893	0.982	5794	tags=57%, list=28%, signal=79%
KEGG_EPITHELIAL_CELL_SIGNALING_IN_HELICOBACTER_PYLORI_INFECTION	KEGG_EPITHELIAL_CELL_SIGNALING_IN_HELICOBACTER_PYLORI_INFECTION		67	-0.369781	-1.31081	0.16129	0.598355	0.982	5665	tags=39%, list=28%, signal=53%
KEGG_CHEMOKINE_SIGNALING_PATHWAY	KEGG_CHEMOKINE_SIGNALING_PATHWAY		185	-0.491821	-1.30874	0.182711	0.587798	0.983	3967	tags=38%, list=19%, signal=47%
KEGG_P53_SIGNALING_PATHWAY	KEGG_P53_SIGNALING_PATHWAY		65	-0.322114	-1.30594	0.141777	0.578728	0.983	5575	tags=32%, list=27%, signal=44%
KEGG_LONG_TERM_DEPRESSION	KEGG_LONG_TERM_DEPRESSION		66	-0.457048	-1.30376	0.11501	0.569353	0.984	2524	tags=26%, list=12%, signal=29%
KEGG_GLUTATHIONE_METABOLISM	KEGG_GLUTATHIONE_METABOLISM		50	-0.421247	-1.30273	0.130342	0.557671	0.985	4812	tags=40%, list=23%, signal=52%
KEGG_ENDOCYTOSIS	KEGG_ENDOCYTOSIS		175	-0.310359	-1.30131	0.15507	0.548285	0.985	4468	tags=26%, list=22%, signal=33%
KEGG_VEGF_SIGNALING_PATHWAY	KEGG_VEGF_SIGNALING_PATHWAY		74	-0.413055	-1.29617	0.153398	0.548347	0.987	3693	tags=28%, list=18%, signal=34%
KEGG_TYPE_II_DIABETES_MELLITUS	KEGG_TYPE_II_DIABETES_MELLITUS		46	-0.476181	-1.29353	0.15493	0.542397	0.987	4394	tags=41%, list=21%, signal=52%
KEGG_TRYPTOPHAN_METABOLISM	KEGG_TRYPTOPHAN_METABOLISM		38	-0.482285	-1.29249	0.13556	0.532975	0.987	6119	tags=55%, list=30%, signal=79%
KEGG_PURINE_METABOLISM	KEGG_PURINE_METABOLISM		148	-0.32337	-1.29071	0.0994152	0.525434	0.988	4753	tags=29%, list=23%, signal=38%
KEGG_CYTOSOLIC_DNA_SENSING_PATHWAY	KEGG_CYTOSOLIC_DNA_SENSING_PATHWAY		54	-0.425181	-1.29025	0.20122	0.51486	0.989	5382	tags=39%, list=26%, signal=53%
KEGG_LEUKOCYTE_TRANSENDOTHELIAL_MIGRATION	KEGG_LEUKOCYTE_TRANSENDOTHELIAL_MIGRATION		114	-0.444718	-1.29006	0.167331	0.504293	0.989	4331	tags=40%, list=21%, signal=51%
KEGG_GALACTOSE_METABOLISM	KEGG_GALACTOSE_METABOLISM		26	-0.434858	-1.28642	0.174257	0.500335	0.989	5637	tags=38%, list=27%, signal=53%
KEGG_ALPHA_LINOLENIC_ACID_METABOLISM	KEGG_ALPHA_LINOLENIC_ACID_METABOLISM		18	-0.538915	-1.27408	0.149225	0.518522	0.993	2521	tags=44%, list=12%, signal=51%
KEGG_B_CELL_RECEPTOR_SIGNALING_PATHWAY	KEGG_B_CELL_RECEPTOR_SIGNALING_PATHWAY		74	-0.463153	-1.27267	0.253438	0.510851	0.993	3497	tags=27%, list=17%, signal=32%
KEGG_HISTIDINE_METABOLISM	KEGG_HISTIDINE_METABOLISM		27	-0.46354	-1.26774	0.188912	0.510675	0.993	3942	tags=37%, list=19%, signal=46%
KEGG_ACUTE_MYELOID_LEUKEMIA	KEGG_ACUTE_MYELOID_LEUKEMIA		57	-0.387426	-1.26097	0.248497	0.515753	0.993	3633	tags=21%, list=18%, signal=26%
KEGG_INOSITOL_PHOSPHATE_METABOLISM	KEGG_INOSITOL_PHOSPHATE_METABOLISM		54	-0.334061	-1.2567	0.20075	0.514788	0.994	5331	tags=35%, list=26%, signal=47%
KEGG_T_CELL_RECEPTOR_SIGNALING_PATHWAY	KEGG_T_CELL_RECEPTOR_SIGNALING_PATHWAY		106	-0.470155	-1.2565	0.258893	0.50567	0.994	3497	tags=29%, list=17%, signal=35%
KEGG_JAK_STAT_SIGNALING_PATHWAY	KEGG_JAK_STAT_SIGNALING_PATHWAY		151	-0.431235	-1.24675	0.203156	0.518706	0.995	3973	tags=30%, list=19%, signal=37%
KEGG_NOD_LIKE_RECEPTOR_SIGNALING_PATHWAY	KEGG_NOD_LIKE_RECEPTOR_SIGNALING_PATHWAY		60	-0.473826	-1.23807	0.252446	0.527726	0.995	3315	tags=30%, list=16%, signal=36%
KEGG_BUTANOATE_METABOLISM	KEGG_BUTANOATE_METABOLISM		34	-0.423188	-1.22399	0.217391	0.548627	0.996	6696	tags=53%, list=33%, signal=78%
KEGG_PATHWAYS_IN_CANCER	KEGG_PATHWAYS_IN_CANCER		321	-0.358842	-1.22316	0.239766	0.541324	0.996	3633	tags=24%, list=18%, signal=29%
KEGG_PROTEASOME	KEGG_PROTEASOME		43	-0.39666	-1.20657	0.299578	0.564333	0.997	8535	tags=53%, list=42%, signal=91%
KEGG_TYROSINE_METABOLISM	KEGG_TYROSINE_METABOLISM		40	-0.453888	-1.19187	0.201629	0.586302	0.998	2665	tags=30%, list=13%, signal=34%
KEGG_GLYCEROPHOSPHOLIPID_METABOLISM	KEGG_GLYCEROPHOSPHOLIPID_METABOLISM		70	-0.328893	-1.17883	0.219885	0.604395	1	4424	tags=30%, list=22%, signal=38%
KEGG_COLORECTAL_CANCER	KEGG_COLORECTAL_CANCER		62	-0.327454	-1.17834	0.280943	0.595292	1	3497	tags=19%, list=17%, signal=23%
KEGG_ALZHEIMERS_DISEASE	KEGG_ALZHEIMERS_DISEASE		144	-0.260092	-1.17691	0.209776	0.589058	1	7581	tags=49%, list=37%, signal=77%
KEGG_VASOPRESSIN_REGULATED_WATER_REABSORPTION	KEGG_VASOPRESSIN_REGULATED_WATER_REABSORPTION		44	-0.336367	-1.17482	0.247485	0.584386	1	8052	tags=45%, list=39%, signal=75%
KEGG_GLIOMA	KEGG_GLIOMA		65	-0.354435	-1.16361	0.279678	0.59958	1	3595	tags=22%, list=18%, signal=26%
KEGG_PANCREATIC_CANCER	KEGG_PANCREATIC_CANCER		69	-0.312324	-1.15711	0.314563	0.603724	1	6673	tags=41%, list=33%, signal=60%
KEGG_ARACHIDONIC_ACID_METABOLISM	KEGG_ARACHIDONIC_ACID_METABOLISM		57	-0.440042	-1.1533	0.230769	0.602258	1	2597	tags=33%, list=13%, signal=38%
KEGG_AMYOTROPHIC_LATERAL_SCLEROSIS_ALS	KEGG_AMYOTROPHIC_LATERAL_SCLEROSIS_ALS		52	-0.38329	-1.15299	0.299413	0.594193	1	4702	tags=38%, list=23%, signal=50%
KEGG_PRIMARY_IMMUNODEFICIENCY	KEGG_PRIMARY_IMMUNODEFICIENCY		35	-0.56291	-1.14622	0.346856	0.599595	1	2362	tags=43%, list=12%, signal=48%
KEGG_MELANOMA	KEGG_MELANOMA		71	-0.410211	-1.1431	0.307847	0.597315	1	3902	tags=30%, list=19%, signal=36%
KEGG_REGULATION_OF_ACTIN_CYTOSKELETON	KEGG_REGULATION_OF_ACTIN_CYTOSKELETON		208	-0.352987	-1.14252	0.291667	0.58995	1	4405	tags=28%, list=21%, signal=35%
KEGG_PHOSPHATIDYLINOSITOL_SIGNALING_SYSTEM	KEGG_PHOSPHATIDYLINOSITOL_SIGNALING_SYSTEM		76	-0.307604	-1.13467	0.320158	0.59826	1	5331	tags=33%, list=26%, signal=44%
KEGG_FATTY_ACID_METABOLISM	KEGG_FATTY_ACID_METABOLISM		40	-0.392738	-1.10651	0.346228	0.643901	1	6251	tags=52%, list=30%, signal=75%
KEGG_LINOLEIC_ACID_METABOLISM	KEGG_LINOLEIC_ACID_METABOLISM		28	-0.480979	-1.09609	0.309381	0.656057	1	2521	tags=36%, list=12%, signal=41%
KEGG_RIG_I_LIKE_RECEPTOR_SIGNALING_PATHWAY	KEGG_RIG_I_LIKE_RECEPTOR_SIGNALING_PATHWAY		68	-0.307507	-1.09478	0.330116	0.649872	1	5959	tags=32%, list=29%, signal=45%
KEGG_CHRONIC_MYELOID_LEUKEMIA	KEGG_CHRONIC_MYELOID_LEUKEMIA		73	-0.265276	-1.08339	0.382178	0.664845	1	5651	tags=25%, list=28%, signal=34%
KEGG_PORPHYRIN_AND_CHLOROPHYLL_METABOLISM	KEGG_PORPHYRIN_AND_CHLOROPHYLL_METABOLISM		39	-0.446241	-1.0763	0.381339	0.671181	1	5457	tags=41%, list=27%, signal=56%
KEGG_THYROID_CANCER	KEGG_THYROID_CANCER		29	-0.310804	-1.0737	0.358824	0.668069	1	527	tags=7%, list=3%, signal=7%
KEGG_CALCIUM_SIGNALING_PATHWAY	KEGG_CALCIUM_SIGNALING_PATHWAY		176	-0.397244	-1.06786	0.39802	0.671191	1	4500	tags=39%, list=22%, signal=49%
KEGG_GLYCOSPHINGOLIPID_BIOSYNTHESIS_LACTO_AND_NEOLACTO_SERIES	KEGG_GLYCOSPHINGOLIPID_BIOSYNTHESIS_LACTO_AND_NEOLACTO_SERIES		25	-0.420937	-1.06632	0.382536	0.665864	1	1991	tags=20%, list=10%, signal=22%
KEGG_GLYCOSAMINOGLYCAN_BIOSYNTHESIS_CHONDROITIN_SULFATE	KEGG_GLYCOSAMINOGLYCAN_BIOSYNTHESIS_CHONDROITIN_SULFATE		22	-0.4497	-1.06608	0.418327	0.658352	1	4205	tags=45%, list=20%, signal=57%
KEGG_GLYCOSAMINOGLYCAN_BIOSYNTHESIS_HEPARAN_SULFATE	KEGG_GLYCOSAMINOGLYCAN_BIOSYNTHESIS_HEPARAN_SULFATE		26	-0.400975	-1.06407	0.387476	0.654837	1	3168	tags=27%, list=15%, signal=32%
KEGG_MAPK_SIGNALING_PATHWAY	KEGG_MAPK_SIGNALING_PATHWAY		263	-0.317926	-1.05507	0.375502	0.664353	1	4494	tags=28%, list=22%, signal=35%
KEGG_METABOLISM_OF_XENOBIOTICS_BY_CYTOCHROME_P450	KEGG_METABOLISM_OF_XENOBIOTICS_BY_CYTOCHROME_P450		69	-0.436755	-1.0531	0.371542	0.660413	1	4812	tags=49%, list=23%, signal=64%
KEGG_PYRIMIDINE_METABOLISM	KEGG_PYRIMIDINE_METABOLISM		95	-0.241982	-1.0493	0.373757	0.660089	1	4827	tags=21%, list=24%, signal=27%
KEGG_RENAL_CELL_CARCINOMA	KEGG_RENAL_CELL_CARCINOMA		66	-0.31123	-1.04461	0.448207	0.661454	1	6767	tags=41%, list=33%, signal=61%
KEGG_AXON_GUIDANCE	KEGG_AXON_GUIDANCE		127	-0.349716	-1.03525	0.439216	0.672138	1	4595	tags=28%, list=22%, signal=36%
KEGG_SELENOAMINO_ACID_METABOLISM	KEGG_SELENOAMINO_ACID_METABOLISM		24	-0.342705	-1.03148	0.42607	0.672384	1	4640	tags=33%, list=23%, signal=43%
KEGG_TIGHT_JUNCTION	KEGG_TIGHT_JUNCTION		128	-0.296722	-1.02783	0.412698	0.671722	1	5331	tags=33%, list=26%, signal=44%
KEGG_PROPANOATE_METABOLISM	KEGG_PROPANOATE_METABOLISM		31	-0.326752	-1.02045	0.430672	0.678345	1	5126	tags=39%, list=25%, signal=52%
KEGG_PHENYLALANINE_METABOLISM	KEGG_PHENYLALANINE_METABOLISM		17	-0.419775	-1.00936	0.444444	0.692142	1	2250	tags=29%, list=11%, signal=33%
KEGG_PENTOSE_AND_GLUCURONATE_INTERCONVERSIONS	KEGG_PENTOSE_AND_GLUCURONATE_INTERCONVERSIONS		26	-0.478761	-1.00504	0.45749	0.692702	1	3885	tags=35%, list=19%, signal=43%
KEGG_FOCAL_ADHESION	KEGG_FOCAL_ADHESION		196	-0.341737	-1.00139	0.491159	0.692759	1	6673	tags=44%, list=33%, signal=64%
KEGG_MELANOGENESIS	KEGG_MELANOGENESIS		101	-0.331068	-0.995272	0.481781	0.696338	1	4306	tags=27%, list=21%, signal=34%
KEGG_REGULATION_OF_AUTOPHAGY	KEGG_REGULATION_OF_AUTOPHAGY		34	-0.305663	-0.992538	0.45509	0.694397	1	5382	tags=32%, list=26%, signal=44%
KEGG_DRUG_METABOLISM_CYTOCHROME_P450	KEGG_DRUG_METABOLISM_CYTOCHROME_P450		71	-0.424025	-0.991935	0.452191	0.688653	1	4812	tags=46%, list=23%, signal=60%
KEGG_NEUROACTIVE_LIGAND_RECEPTOR_INTERACTION	KEGG_NEUROACTIVE_LIGAND_RECEPTOR_INTERACTION		270	-0.386633	-0.991244	0.460039	0.6829	1	4142	tags=38%, list=20%, signal=47%
KEGG_PANTOTHENATE_AND_COA_BIOSYNTHESIS	KEGG_PANTOTHENATE_AND_COA_BIOSYNTHESIS		16	-0.419643	-0.980935	0.500982	0.694881	1	2333	tags=25%, list=11%, signal=28%
KEGG_COMPLEMENT_AND_COAGULATION_CASCADES	KEGG_COMPLEMENT_AND_COAGULATION_CASCADES		68	-0.448376	-0.980483	0.523422	0.688625	1	3900	tags=44%, list=19%, signal=54%
KEGG_VASCULAR_SMOOTH_MUSCLE_CONTRACTION	KEGG_VASCULAR_SMOOTH_MUSCLE_CONTRACTION		111	-0.334069	-0.972092	0.496124	0.696297	1	4605	tags=32%, list=22%, signal=42%
KEGG_ERBB_SIGNALING_PATHWAY	KEGG_ERBB_SIGNALING_PATHWAY		86	-0.270912	-0.968772	0.516899	0.695056	1	3633	tags=20%, list=18%, signal=24%
KEGG_DILATED_CARDIOMYOPATHY	KEGG_DILATED_CARDIOMYOPATHY		90	-0.373983	-0.965855	0.500982	0.693027	1	5800	tags=43%, list=28%, signal=60%
KEGG_SMALL_CELL_LUNG_CANCER	KEGG_SMALL_CELL_LUNG_CANCER		84	-0.271338	-0.963322	0.522158	0.690696	1	5779	tags=26%, list=28%, signal=36%
KEGG_DRUG_METABOLISM_OTHER_ENZYMES	KEGG_DRUG_METABOLISM_OTHER_ENZYMES		49	-0.412614	-0.962376	0.510934	0.685975	1	3475	tags=27%, list=17%, signal=32%
KEGG_CITRATE_CYCLE_TCA_CYCLE	KEGG_CITRATE_CYCLE_TCA_CYCLE		30	-0.310277	-0.958412	0.474206	0.686368	1	8275	tags=73%, list=40%, signal=123%
KEGG_PATHOGENIC_ESCHERICHIA_COLI_INFECTION	KEGG_PATHOGENIC_ESCHERICHIA_COLI_INFECTION		53	-0.258164	-0.95577	0.536534	0.68457	1	5818	tags=26%, list=28%, signal=37%
KEGG_NEUROTROPHIN_SIGNALING_PATHWAY	KEGG_NEUROTROPHIN_SIGNALING_PATHWAY		125	-0.252899	-0.955493	0.500998	0.678638	1	5237	tags=26%, list=26%, signal=34%
KEGG_PROXIMAL_TUBULE_BICARBONATE_RECLAMATION	KEGG_PROXIMAL_TUBULE_BICARBONATE_RECLAMATION		23	-0.387292	-0.95324	0.520388	0.676526	1	4821	tags=43%, list=23%, signal=57%
KEGG_PROGESTERONE_MEDIATED_OOCYTE_MATURATION	KEGG_PROGESTERONE_MEDIATED_OOCYTE_MATURATION		85	-0.264788	-0.952817	0.494118	0.671159	1	3650	tags=19%, list=18%, signal=23%
KEGG_ENDOMETRIAL_CANCER	KEGG_ENDOMETRIAL_CANCER		52	-0.24995	-0.941988	0.526419	0.683579	1	3497	tags=13%, list=17%, signal=16%
KEGG_PRION_DISEASES	KEGG_PRION_DISEASES		35	-0.362159	-0.930734	0.573333	0.696875	1	2258	tags=20%, list=11%, signal=22%
KEGG_ASCORBATE_AND_ALDARATE_METABOLISM	KEGG_ASCORBATE_AND_ALDARATE_METABOLISM		24	-0.456062	-0.920707	0.55144	0.707705	1	5457	tags=46%, list=27%, signal=62%
KEGG_HYPERTROPHIC_CARDIOMYOPATHY_HCM	KEGG_HYPERTROPHIC_CARDIOMYOPATHY_HCM		83	-0.353823	-0.916098	0.56213	0.709125	1	5716	tags=41%, list=28%, signal=57%
KEGG_BLADDER_CANCER	KEGG_BLADDER_CANCER		40	-0.258765	-0.914399	0.571984	0.705978	1	4288	tags=25%, list=21%, signal=32%
KEGG_ARRHYTHMOGENIC_RIGHT_VENTRICULAR_CARDIOMYOPATHY_ARVC	KEGG_ARRHYTHMOGENIC_RIGHT_VENTRICULAR_CARDIOMYOPATHY_ARVC		74	-0.357443	-0.910475	0.597561	0.706757	1	3531	tags=26%, list=17%, signal=31%
KEGG_HUNTINGTONS_DISEASE	KEGG_HUNTINGTONS_DISEASE		160	-0.189252	-0.908169	0.565574	0.70433	1	7739	tags=43%, list=38%, signal=69%
KEGG_RETINOL_METABOLISM	KEGG_RETINOL_METABOLISM		62	-0.409898	-0.908072	0.596708	0.698399	1	3703	tags=35%, list=18%, signal=43%
KEGG_HEDGEHOG_SIGNALING_PATHWAY	KEGG_HEDGEHOG_SIGNALING_PATHWAY		56	-0.351198	-0.907247	0.595285	0.693838	1	3288	tags=30%, list=16%, signal=36%
KEGG_GNRH_SIGNALING_PATHWAY	KEGG_GNRH_SIGNALING_PATHWAY		100	-0.257495	-0.893505	0.636183	0.710987	1	2892	tags=16%, list=14%, signal=19%
KEGG_ABC_TRANSPORTERS	KEGG_ABC_TRANSPORTERS		44	-0.333315	-0.890655	0.631791	0.70952	1	3539	tags=27%, list=17%, signal=33%
KEGG_RENIN_ANGIOTENSIN_SYSTEM	KEGG_RENIN_ANGIOTENSIN_SYSTEM		17	-0.40108	-0.875722	0.658586	0.728902	1	2341	tags=24%, list=11%, signal=27%
KEGG_FRUCTOSE_AND_MANNOSE_METABOLISM	KEGG_FRUCTOSE_AND_MANNOSE_METABOLISM		32	-0.266543	-0.854742	0.649299	0.757957	1	7630	tags=50%, list=37%, signal=79%
KEGG_BETA_ALANINE_METABOLISM	KEGG_BETA_ALANINE_METABOLISM		22	-0.321543	-0.851893	0.668085	0.756731	1	5126	tags=41%, list=25%, signal=54%
KEGG_NOTCH_SIGNALING_PATHWAY	KEGG_NOTCH_SIGNALING_PATHWAY		47	-0.221595	-0.842925	0.64271	0.765486	1	1730	tags=9%, list=8%, signal=9%
KEGG_ECM_RECEPTOR_INTERACTION	KEGG_ECM_RECEPTOR_INTERACTION		83	-0.346986	-0.842245	0.655769	0.760681	1	6605	tags=51%, list=32%, signal=74%
KEGG_PEROXISOME	KEGG_PEROXISOME		77	-0.239632	-0.823018	0.629191	0.786584	1	7617	tags=49%, list=37%, signal=78%
KEGG_WNT_SIGNALING_PATHWAY	KEGG_WNT_SIGNALING_PATHWAY		149	-0.24128	-0.821817	0.727273	0.782547	1	4494	tags=23%, list=22%, signal=30%
KEGG_CARDIAC_MUSCLE_CONTRACTION	KEGG_CARDIAC_MUSCLE_CONTRACTION		73	-0.288525	-0.81484	0.733598	0.788004	1	4883	tags=29%, list=24%, signal=38%
KEGG_TERPENOID_BACKBONE_BIOSYNTHESIS	KEGG_TERPENOID_BACKBONE_BIOSYNTHESIS		15	-0.332556	-0.808499	0.648262	0.792403	1	8872	tags=67%, list=43%, signal=117%
KEGG_GAP_JUNCTION	KEGG_GAP_JUNCTION		85	-0.260565	-0.806998	0.762575	0.788556	1	2485	tags=15%, list=12%, signal=17%
KEGG_BASAL_CELL_CARCINOMA	KEGG_BASAL_CELL_CARCINOMA		55	-0.305413	-0.804563	0.744681	0.786617	1	4306	tags=33%, list=21%, signal=41%
KEGG_TGF_BETA_SIGNALING_PATHWAY	KEGG_TGF_BETA_SIGNALING_PATHWAY		85	-0.263115	-0.788081	0.761811	0.807452	1	4224	tags=25%, list=21%, signal=31%
KEGG_STEROID_HORMONE_BIOSYNTHESIS	KEGG_STEROID_HORMONE_BIOSYNTHESIS		54	-0.328742	-0.776175	0.787755	0.819402	1	3891	tags=33%, list=19%, signal=41%
KEGG_N_GLYCAN_BIOSYNTHESIS	KEGG_N_GLYCAN_BIOSYNTHESIS		46	-0.186418	-0.773306	0.753452	0.817956	1	2967	tags=11%, list=14%, signal=13%
KEGG_GLYCEROLIPID_METABOLISM	KEGG_GLYCEROLIPID_METABOLISM		43	-0.232076	-0.767364	0.87061	0.820944	1	5124	tags=30%, list=25%, signal=40%
KEGG_ONE_CARBON_POOL_BY_FOLATE	KEGG_ONE_CARBON_POOL_BY_FOLATE		17	-0.278319	-0.761973	0.751012	0.823136	1	5135	tags=35%, list=25%, signal=47%
KEGG_MTOR_SIGNALING_PATHWAY	KEGG_MTOR_SIGNALING_PATHWAY		51	-0.209782	-0.75726	0.749027	0.824408	1	4411	tags=22%, list=21%, signal=27%
KEGG_GLYCOLYSIS_GLUCONEOGENESIS	KEGG_GLYCOLYSIS_GLUCONEOGENESIS		61	-0.239143	-0.75682	0.857143	0.818949	1	4394	tags=28%, list=21%, signal=35%
KEGG_INSULIN_SIGNALING_PATHWAY	KEGG_INSULIN_SIGNALING_PATHWAY		137	-0.180698	-0.739835	0.893069	0.837937	1	4492	tags=17%, list=22%, signal=21%
KEGG_LONG_TERM_POTENTIATION	KEGG_LONG_TERM_POTENTIATION		69	-0.225624	-0.731076	0.896825	0.844315	1	6788	tags=43%, list=33%, signal=65%
KEGG_ADIPOCYTOKINE_SIGNALING_PATHWAY	KEGG_ADIPOCYTOKINE_SIGNALING_PATHWAY		67	-0.219953	-0.713466	0.848723	0.862228	1	5644	tags=30%, list=27%, signal=41%
KEGG_UBIQUITIN_MEDIATED_PROTEOLYSIS	KEGG_UBIQUITIN_MEDIATED_PROTEOLYSIS		130	-0.107794	-0.688214	0.843931	0.889079	1	18332	tags=100%, list=89%, signal=928%
KEGG_MATURITY_ONSET_DIABETES_OF_THE_YOUNG	KEGG_MATURITY_ONSET_DIABETES_OF_THE_YOUNG		25	-0.272613	-0.671704	0.944	0.903699	1	3670	tags=28%, list=18%, signal=34%
KEGG_STARCH_AND_SUCROSE_METABOLISM	KEGG_STARCH_AND_SUCROSE_METABOLISM		49	-0.253695	-0.620186	0.958251	0.951121	1	4467	tags=35%, list=22%, signal=44%
KEGG_ADHERENS_JUNCTION	KEGG_ADHERENS_JUNCTION		68	-0.159747	-0.578736	0.892857	0.977308	1	4405	tags=16%, list=21%, signal=21%
KEGG_CYSTEINE_AND_METHIONINE_METABOLISM	KEGG_CYSTEINE_AND_METHIONINE_METABOLISM		34	-0.1851	-0.559962	0.985944	0.981784	1	5697	tags=29%, list=28%, signal=41%
KEGG_PENTOSE_PHOSPHATE_PATHWAY	KEGG_PENTOSE_PHOSPHATE_PATHWAY		26	-0.16943	-0.527379	0.97006	0.991211	1	7294	tags=38%, list=36%, signal=60%
KEGG_PRIMARY_BILE_ACID_BIOSYNTHESIS	KEGG_PRIMARY_BILE_ACID_BIOSYNTHESIS		16	-0.23912	-0.514162	0.993802	0.989468	1	3364	tags=25%, list=16%, signal=30%
KEGG_BIOSYNTHESIS_OF_UNSATURATED_FATTY_ACIDS	KEGG_BIOSYNTHESIS_OF_UNSATURATED_FATTY_ACIDS		20	-0.166577	-0.440898	0.989626	1	1	6475	tags=30%, list=32%, signal=44%
KEGG_RIBOSOME	KEGG_RIBOSOME		87	-0.112013	-0.318092	0.991753	0.999855	1	13855	tags=95%, list=67%, signal=292%
